1 **First fossil skull of an anteater (*Vermilingua*, Myrmecophagidae) from**  
2 **northern South America, a taxonomic reassessment of *Neotamandua* and**  
3 **a discussion of the myrmecophagid diversification**

4

5 Kevin Jiménez-Lara<sup>a,b\*</sup>, Jhon González

6 <sup>a</sup>División de Paleontología de Vertebrados, Museo de La Plata, Facultad de Ciencias  
7 Naturales y Museo, Universidad Nacional de La Plata, Paseo del Bosque s/n, B1900FWA  
8 La Plata, Argentina.

9 <sup>b</sup>CONICET, Consejo Nacional de Investigaciones Científicas y Técnicas, Argentina.

10 \*Corresponding author. E-mail: [kjimenezlara@fcnym.unlp.edu.ar](mailto:kjimenezlara@fcnym.unlp.edu.ar)

11

12 The evolutionary history of the South American anteaters, *Vermilingua*, is incompletely  
13 known as consequence of the fragmentary and geographically biased nature of the fossil  
14 record of this group. The only record of a nominal extinct species for northern South  
15 America is *Neotamandua borealis*, from the Middle Miocene of La Venta area,  
16 southwestern Colombia (Hirschfeld 1976). A new genus and species of myrmecophagid for  
17 La Venta is described here from a new partial skull. Additionally, the taxonomic status of  
18 the genus to which was referred the co-occurrent species of Gen. et sp. nov., i.e.  
19 *Neotamandua*, is revised. The morphological and taxonomic analyses of these taxa indicate  
20 that Gen. et sp. nov. may be related to *Tamandua* and that the justification of the generic  
21 assignments of the referred species to *Neotamandua* is weak, with high probability of

22 reassigning some of them to a new genus. Two species previously referred to *Neotamandua*  
23 (*N. magna* and *N.? australis*) were designated as *species inquirendae* and new diagnostic  
24 information for the redefined genus and its type species, *N. conspicua*, is provided.  
25 Together, these results suggest that the diversification of Myrmecophagidae was  
26 taxonomically and biogeographically more complex than that what has been proposed so  
27 far. Considering the new evidence, it is proposed a synthetic model on the diversification of  
28 these xenarthrans during the late Cenozoic based on the probable relationship between their  
29 intrinsic ecological constraints and some major abiotic changes in the Americas.

30 **Key words:** Vermilingua, Myrmecophagidae, diversification, *Neotamandua*, La Venta  
31 area, Neogene.

32

### 33 **Introduction**

34 The anteaters of the suborder Vermilingua are part of Xenarthra, one of the more inclusive  
35 clades in the evolutionary tree of the placental mammals (Eutheria) and a characteristic  
36 group in the land mammal assemblages of the middle-late Cenozoic of the Americas  
37 (McDonald et al. 2008; Foley et al. 2016; Halliday et al. 2016; Feijoo & Parada 2017).  
38 Within Xenarthra, Vermilingua belongs to Pilosa, a clade that also includes the sloths, i.e.  
39 Tardigrada. Today, Vermilingua comprises the genera *Cyclopes* (pygmy anteaters),  
40 *Tamandua* (collared anteaters) and *Myrmecophaga* (giant anteaters). These genera groups  
41 ten extant species, the most of them (seven) belonging to *Cyclopes*, according to the most  
42 recent exhaustive taxonomic revision (Miranda et al. 2017). The classic phylogenetic  
43 hypothesis reunites *Tamandua* and *Myrmecophaga* in the family Myrmecophagidae, while

44 *Cyclopes* is located in a basal position with respect to Myrmecophagidae as the only recent  
45 form of the family Cyclopedidae (Engelmann 1985). With the connotation of a superior  
46 taxonomic hierarchy (i.e. at the family level; Barros et al. 2008; Gibb et al. 2015) by an  
47 early evolutionary divergence (Hirschfeld 1976; Delsuc et al. 2001; Gibb et al. 2016) and in  
48 acknowledgment of a more extended use in the scientific literature, the names  
49 Myrmecophagidae and Cyclopedidae are used here, instead of Myrmecophaginae and  
50 Cyclopiniae *sensu* Gaudin & Branham (1998), respectively. However, the taxonomic  
51 content of Myrmecophaginae and Cyclopiniae, including extinct forms, is considered as  
52 transferable to their counterparties (McDonald et al. 2008).

53 The living anteaters, whose mean body mass ranges from ~0.4 and 30 kilograms (Gaudin et  
54 al. 2018), are highly, morphologically specialized mammals by exhibiting remarkable  
55 skeleton and soft-anatomy modifications, which are closely linked to their  
56 myrmecophagous diets, i.e. diets consisting of at least 90% of ants/termites (Redford 1987;  
57 McDonald et al. 2008). Many of these adaptations, anatomically located in the skull and  
58 jaws, are associated between them in several ways by being part of the architecture of an  
59 integrated functional system of food apprehension and ingestion. Among these features, the  
60 following are some of the most noteworthy: rostral elongation and narrowing, basicranial-  
61 basifacial axis curvature, complete loss of teeth, gracile jaw, reduction of the adductor jaw  
62 muscles, unfused jaw symphysis and protrusible long tongue (Reiss 2001; Gaudin &  
63 McDonald 2008; McDonald et al. 2008). Several of these morphological specializations are  
64 convergent with those described for other myrmecophagous mammals such as the  
65 pangolins (Pholidota) and the armadillos (Tubulidentata), so it is not surprising that early  
66 systematic researchers erroneously proposed close common ancestry of *Vermilingua* with

67 these Old world groups from their superficial similarities (e.g. Engelmann 1978; Norman &  
68 Ashley 1994).

69 Despite their unique biology and ecology, at least in the context of the land mammals of the  
70 Americas, the evolutionary history of the anteaters is largely obscured by their poor,  
71 fragmentary and geographically biased fossil record (Hirschfeld 1976; Gaudin & Branham  
72 1998; McDonald et al. 2008). Generally, five valid genera and nine species are recognized  
73 in the fossil record of Vermilingua, of which two genera and two species have extant  
74 representatives, i.e. *Myrmecophaga tridactyla* and *Tamandua tetradactyla*.

75 Myrmecophagidae groups nearly all these fossil taxa (only one genus and one species for  
76 Cyclopedidae) in a general biochron beginning c. 18 million years before present, most of  
77 them distributed throughout the Neogene (McDonald et al. 2008). But while the record of  
78 this family for the latter period is taxonomically more diverse than that for the Quaternary,  
79 it also poses more difficulties in the systematic framework of the implicated taxa. The  
80 oldest member of Myrmecophagidae is *Protamandua rothi*, from the late Early Miocene of  
81 the Santa Cruz Province, southern Argentina (Ameghino 1904). This species has been well  
82 validated from a pair of incomplete skulls and several postcranial bones, but the validity of  
83 other co-occurrent putative vermilinguan (myrmecophagid?) taxa is, at least, questionable  
84 (Hirschfeld 1976; McDonald et al. 2008). For the early Middle Miocene has been reported  
85 a myrmecophagid doubtfully assigned to *Neotamandua*, and yet used to create a new  
86 species from isolated humeral remains (*N.? australis*; Scillato-Yané & Carlini 1998). In the  
87 latter genus was also allocated, with some uncertainty, postcranial material of a middle-to-  
88 large sized anteater recorded in the late Middle Miocene of La Venta area, southwestern  
89 Colombia, whose description includes the only nominal extinct species for northern South

90 America, i.e. *N. borealis* (Hirschfeld 1976). *Neotamandua* chronologically extends to the  
91 Late Miocene and Early Pliocene with the species *N. magna* (Ameghino 1919), *N.*  
92 *greslebini* (Kraglievich 1940) and *N. conspicua* (type species; Rovereto 1914), all of them  
93 from northwestern Argentina (provinces of Catamarca and Tucumán). This genus is  
94 typically recognized as morphologically similar (even directly ancestral) to *Myrmecophaga*,  
95 although smaller in body size (Hirschfeld 1976; Gaudin & Branham 1998). Considering the  
96 very few anatomically correlatable elements in which are based the different species  
97 referred to *Neotamandua*, Hirschfeld (1976) and Scillato-Yané & Carlini (1998) have  
98 suggested that this genus could be paraphyletic. Furthermore, the latter authors proposed  
99 the hypothesis that *Neotamandua* is composed by two distinct evolutionary lineages: one  
100 more closely related to *Myrmecophaga* and other one to *Tamandua*. In turn, these two  
101 lineages would have diverged in allopatry in South America, in such a way that the  
102 geographical origin of *Myrmecophaga* is located in northern South America, while that of  
103 *Tamandua* is in southern South America.

104 In this article, we describe the first fossil skull of a myrmecophagid (and vermilinguan)  
105 from northern South America. This specimen was collected in the Middle Miocene La  
106 Victoria Formation of La Venta area, Colombia. Additionally, in coming to analysis  
107 because it is the only nominal taxon reported for the same region and geological unit, the  
108 taxonomic status of *Neotamandua* is revised. The results prompt the development of a  
109 discussion on a model of diversification for Myrmecophagidae in which new and previous  
110 hypothesis about this evolutionary event are synthesized. This contribution is intended to  
111 reevaluate, expand and integrate biotic and abiotic evidence related to the diversification of

112 this fascinating mammal group, with emphasis on the biogeographic role of tropical, low  
113 latitude regions of the Americas.

114

## 115 **Material and methods**

116 The cranial specimen described for the first time here for Colombia (VPPLT 975) comes  
117 from a light-brown mudstone layer in the Llano Largo field, around 2 Km northeast of La  
118 Victoria town, Municipality of Villavieja, Department of Huila (Fig. 1A-C). Strata of the  
119 La Victoria Formation outcrop there, within the palaeontologically relevant area of La  
120 Venta. The La Victoria Formation is a geological unit of ~500 meters in thickness which is  
121 mainly composed by bioturbated mudstones (Anderson et al. 2016). These sedimentites are  
122 interrupted by very continuous, coarse-to-fine grained sandstones with crossbedding and  
123 erosive bases. According to the lithostratigraphic scheme of Guerrero (1997; Fig. 1D), the  
124 new skull is from a level stratigraphically close (<20 m) and below the Chunchullo  
125 sandstone beds, i.e. the lower part of the La Victoria Formation. This corresponds to the  
126 unit referred as “Unit between the Cerro Gordo and Chunchullo sandstone beds”. As  
127 described by the same author, this unit, whose thickness ranges from ~80 to 160 m, is  
128 predominantly composed of mudstones and some interlayers of sandstones. This  
129 sedimentary body bears abundant plutonic and volcanic fragments from the lower Jurassic  
130 basement of the Honda Group (Saldaña Formation), as well as clasts of volcanic rocks  
131 formed in the magmatic arc of the Cordillera Central of Colombia during the Middle  
132 Miocene (Anderson et al. 2016).

133 The general palaeoenvironment inferred for the La Victoria Formation is a meandering  
134 fluvial system (except for the Cerbatana conglomerate, associated to an anastomosed  
135 system) with significant soil development in flood plain zones (Guerrero 1997). The ages  
136 calculated by Guerrero (1997) and Flynn et al. (1997) using magnetic polarity stratigraphy  
137 and geochronology indicate sedimentary deposition during the interval 13.8–12.5 million  
138 years ago (mya). These results have recently been reinforced by the U-Pb geochronology of  
139 detrital zircons recovered in this formation (Anderson et al. 2016). The age range obtained  
140 is  $14.4 \pm 1.9$  –  $13.2 \pm 1.3$  mya. This interval coincides approximately with the early  
141 Serravalian, sub-stage of the Middle Miocene [Insert Fig. 1 here].

142 Cranial measurements, with some nomenclatural modifications, are based on those of  
143 Hossotani et al. (2017) (Fig. 2; see Anatomical Abbreviations). All these measurements are  
144 in millimetres (mm). The description of the new skull of La Venta includes a rough body  
145 mass estimation of the respective individual from a traditional allometric approach. All  
146 these data and analyses are compiled in the Supplementary material (Appendices S1 and  
147 S3). For the taxonomic analysis of the genus *Neotamandua* were revised the justifications  
148 of generic allocations for the referred species (at least doubtfully) in all the relevant  
149 scientific literature. These species are: *Neotamandua conspicua* Rovereto 1914 (type  
150 species); *Neotamandua magna* Ameghino 1919; *Neotamandua greslebini* Kraglievich  
151 1940; *Neotamandua borealis* Hirschfeld 1976; *Neotamandua? australis* Scillato-Yané &  
152 Carlini 1998. Additionally, some observations were made on the holotypes of *N. conspicua*  
153 (MACN 8097) and *N. borealis* (UCMP 39847) to reexamine the described characteristics  
154 for these species in the original publications (Rovereto 1914 and Hirschfeld 1976,  
155 respectively). The conceptual model of Plotnick & Warner (2006) to recognize taxonomic

156 wastebaskets was applied to *Neotamandua*. From the foregoing and the designation of the  
157 specimen FMNH P14419 as epitype of *N. conspicua*, it was proposed a diagnosis for  
158 *Neotamandua*. See a list of all the studied fossil specimens in the Appendix S1 of the  
159 Supplementary material [Insert Fig. 2 here].

160 On other hand, considering that Hirschfeld (1976), in her description of *N. borealis*, did not  
161 include morphological comparisons from postcranial bones of this species and homologous  
162 elements of the species referred to *Neotamandua* for southern South America, we  
163 performed this task and a preliminary character distribution analysis from postcrania of  
164 these taxa to explore the hypothesis that they are closely related. Forcibly, *N. magna* and  
165 *N.? australis* are excluded from the comparisons since they do not have osteological  
166 elements correlated with those of *N. borealis* (or any other species referred to  
167 *Neotamandua*). Additionally, as a result of loss of its holotype (McDonald et al. 2008),  
168 comparisons with *N. greslebini* are based exclusively on the non-illustrated description by  
169 Kraglievich (1940). Other comparisons include postcranium collected by Juan Méndez in  
170 1911 in the upper Miocene of the Andalhuala locality, Catamarca Province, Argentina. This  
171 material was assigned to *Neotamandua* (*Neotamandua* sp.) without a reference publication.  
172 McDonald et al. (2008) manifested doubt about this taxonomic assignment  
173 (*Neotamandua?*), but these authors simultaneously speculated that it might be the lost  
174 holotype of *N. greslebini*.

175 Following to McKenna & Bell (1997), the genus *Nunezia* is considered a junior synonym  
176 of *Myrmecophaga*. Myological inferences are based on Hirschfeld (1976) and Gambaryan  
177 et al. (2009).

178



179 **Institutional abbreviations**

180 **CAC:** Cátedra de Anatomía Comparada, Facultad de Ciencias Naturales y Museo,  
181 Universidad Nacional de La Plata; **FMNH:** Field Museum, Chicago, IL., USA; **ICN:**  
182 Instituto de Ciencias Naturales, Facultad de Ciencias, Universidad Nacional, Bogotá,  
183 Colombia; **MACN:** Museo Argentino de Ciencias Naturales ‘Bernardino Rivadavia’,  
184 Buenos Aires, Argentina; **MLP:** Museo de La Plata, Facultad de Ciencias Naturales y  
185 Museo, Universidad Nacional de La Plata, La Plata, Argentina; **MPT:** Museo Provincial de  
186 Tucumán, Tucumán, Argentina; **UCMP:** University of California Museum of  
187 Paleontology, Berkeley, CA., USA; **VPPLT:** Museo de Historia Natural La Tatacoa, La  
188 Victoria, Huila, Colombia; **YPM:** Peabody Museum, Yale University, New Haven, CT,  
189 USA.

190

191 **Anatomical abbreviations**

192 Abbreviations of equivalent measurements by Hossotani et al. (2017) in parenthesis. **FL**,  
193 frontal length; **GSL (SL)**, greatest skull length; **MBW (NC)**, maximum braincase width;  
194 **ML**, maxilla length; **NL**, nasal length; **NW (NB)**, nasal width; **PL**, parietal length.

195

196 **SYSTEMATIC PALAEOLOGY**

197 **Xenarthra** Cope, 1889

198 **Pilosa** Flower, 1883

199 **Vermilingua** Illiger, 1811

200 **Myrmecophagidae** Gray, 1825

201 **Gen. nov.**

202 **Etymology.** [intentionally in blank].

203 **Diagnosis.** Same as that of the type and only known species.

204

205 **Gen. et sp. nov.**

206 (Fig. 3)

207 **Etymology.** [intentionally in blank]

208 **Holotype.** VPPLT 975, anterior portion of a skull, without jugals nor premaxillae.

209 **Diagnosis.** Middle sized myrmecophagid, slightly smaller than *Tamandua* and even more  
210 than *Neotamandua*. It can be differentiated from other genera/species of anteaters by the  
211 following combination of cranial features: relatively width rostrum, similar to *Tamandua*;  
212 narrow and strongly tapered nasals toward their anterior end; anteroposterior length of the  
213 pre-orbital section of frontals equal to more than two thirds of the anteroposterior length of  
214 nasals; jugals inserted from the same level of the most anterior border of the lacrimal;  
215 anterior portion of the orbit more laterally extended in the superior wall in the inferior one,  
216 without forming a conspicuous dome as in *Neotamandua conspicua*.

217 **Comparative description of the holotype of Gen. et sp. nov.** The specimen VPPLT 975  
218 consists of a partial skull that preserves nearly all the anatomical elements from the anterior  
219 section of the frontals (at the mid anteroposterior level of the orbit) to the anterior end of  
220 the rostrum. See cranial measurements taken for this new taxon and other myrmecophagids

221 in the Table 1. The estimated body mass for this individual is around 3.9 Kg (Appendix S3  
222 of the Supplementary material). As consequence of the preservation, some sutures are  
223 distinguishable in dorsal and lateral views, but virtually no suture is clearly detectable in  
224 ventral view. The rostrum is proportionally shorter and more robust than those in  
225 *Myrmecophaga* and *N. conspicua* (see below), but less than in *Tamandua*. In dorsal view, it  
226 is very similar to the skull of *Tamandua*, with at least four characteristics remarkably  
227 different with respect this extant genus: (1) lower rostrum; (2) rostrum more regularly  
228 tapered; (3) narrower and more anteriorly tapered nasals; (4) pre-orbital section of the  
229 frontals more anteroposteriorly elongated. In dorsal view, the rostrum shows a slight bulge  
230 in its middle part, similar to that in *Tamandua* and *Myrmecophaga*. However, in VPPLT  
231 975 this bulge is even subtler than in the living myrmecophagids. Apparently, the nasals are  
232 shorter than frontals and are poorly exposed in lateral view. The jugals are absent by  
233 preservation, but it is possible to recognize their insertion location. This is more anterior  
234 than in *Myrmecophaga*, but more posterior than in *Tamandua*. Associated to the insertion  
235 of the jugal, there is a reduced posterolateral process of the maxilla in comparison with that  
236 of *Myrmecophaga*, similar in *Tamandua*. The right side of the skull preserves better the  
237 lacrimal zone, but it is simultaneously more deformed around the fronto-maxillary suture  
238 than in the left side. The lacrimal is longer in its anteroposterior axis than in that  
239 dorsoventral. The same bone is proportionally smaller than in *Tamandua* and even more  
240 than in *N. conspicua*. It has a triangular outline (at least anteriorly), similar to  
241 *Myrmecophaga* and unlike *Tamandua* (irregularly rounded, ovated, or, infrequently, sub-  
242 triangular lacrimal). The maxilla is not part of the orbit. The superior wall of the orbit is  
243 more laterally expanded than the inferior wall, without forming a conspicuous dome as in  
244 *N. conspicua*. This is similar to the condition observed in *Myrmecophaga* and differs from

245 that in *Tamandua*, in which the inferior wall is prominent given that it is more laterally  
246 expanded. It is not possible to recognize lacrimal nor orbital foramina. In ventral view, the  
247 dorsal border of the orbit is regularly concave. The palatines are less laterally extended than  
248 in *Tamandua* and apparently there are no palatine “wings” (noticeable lateral expansions of  
249 the palatines), unlike *N. conspicua* [Insert Fig. 3 here].

250

## 251 **Taxonomic reanalysis of the genus *Neotamandua***

### 252 **Taxonomic history and discussion on the taxonomic status of *Neotamandua***

253 The genus *Neotamandua* was proposed by Rovereto (1914) from a posterior portion of a  
254 skull (MACN 8097), which was collected in upper Miocene-to-Pliocene strata of the  
255 Catamarca Province, Argentina. The name *Neotamandua*, literally meaning ‘new  
256 tamandua’, was coined by Rovereto in allusion to the cranial similarity of the type species,  
257 *N. conspicua*, with the extant genus *Tamandua*, rather than with *Myrmecophaga*. This  
258 detail would be historically paradoxical, as will be shown below. It is important to note that  
259 Rovereto did not provide a diagnosis for *Neotamandua*, but he just briefly described the  
260 holotype of *N. conspicua*, emphasizing its elongated parietals. However, this feature, more  
261 comparable with that in *Myrmecophaga* than that in any other myrmecophagid, was  
262 correlated with the anteroposterior length of the parietals in *Tamandua*. A few years after  
263 the Rovereto’s work, Carlos Ameghino (Ameghino 1919) used a pelvis (MPT 58)  
264 recovered in contemporary strata of the Tucuman Province, Argentina, to create a new  
265 species, *N. magna*. Despite the taxonomic assignment of this pelvis to *Neotamandua*,  
266 Ameghino discussed that, alternatively, this species could belong to other genus of larger

267 body size, as Kraglievich (1940) also held. Formally, *N. magna* has not been reevaluated,  
268 but McDonald et al. (2008) suggested that, given that this species was transferred to  
269 *Nunezia* by Kraglievich (1934), and *Nunezia* is considered a junior synonym of  
270 *Myrmecophaga* (Hirschfeld 1976; McKenna & Bell 1997), then *N. magna* should be  
271 included in the latter genus, i.e. *Myrmecophaga magna* comb. nov. (unpublished). Indeed,  
272 the morphological differences cited by Ameghino (1919) and Kraglievich (1940) between  
273 the pelvis of *N. magna* and that of *M. tridactyla* (e.g. greater width and ventral flattening of  
274 the intermediate sacral vertebrae) do not seem sufficient to consider a generic distinction  
275 between these species.

276 Two decades later, Kraglievich (1940) proposed a new species from postcranium collected  
277 in the upper Miocene of the Catamarca Province. This was initially assigned to *N.*  
278 *conspicua*. According to Kraglievich, the then new species, *N. greslebini*, is easily  
279 identifiable by its large size, intermediate between those of *N. conspicua* and *N. magna*.  
280 Like Rovereto (1914), this author also correlated his generic assignment of *N. greslebini* to  
281 *Neotamandua* from the similarity between the fossil specimens of this species and  
282 homologous elements of *Tamandua* (Kraglievich, p. 633). The holotype of *N. greslebini* is  
283 missing or mixed up with material labelled with generic names of extinct anteaters (i.e.  
284 *Neotamandua* and *Palaeomyrmidon*) in the Museo Argentino de Ciencias Naturales  
285 (MACN), in Buenos Aires, Argentina (McDonald et al. 2008).

286 Already in the second half of the XX century, a controversy about the possible synonymy  
287 between *Neotamandua* and *Myrmecophaga* arose. This means that there was a radical  
288 paradigmatic shift in myrmecophagid systematics, from that in early XX century, in which  
289 *Neotamandua* was considered closely related to *Tamandua*, to that in late XX century, in

290 which *Neotamandua* was even a serious candidate to be a junior synonym of  
291 *Myrmecophaga*. This historical change began with the non-cladistic systematic analysis of  
292 Hirschfeld (1976), in which *Neotamandua* was originally proposed as the direct ancestor  
293 (anagenetic form) of *Myrmecophaga*. In the same work, Hirschfeld created the first and,  
294 until now, only nominal extinct species of Vermilingua and Myrmecophagidae for northern  
295 South America, *N. borealis* (Middle Miocene of Colombia). Given the scarcity and  
296 fragmentation of the specimens referred to *Neotamandua*, Hirschfeld recognized the need  
297 to revise the taxonomic validity of *N. conspicua*, *N. magna* and *N. greslebini*. Indeed, she  
298 went beyond and stated that *Neotamandua* species could be representatives of more than  
299 one single genus. However, her assignment of *N. borealis* to *Neotamandua* was based  
300 primarily on the idea that the fossils she studied are ‘considerably more advanced than  
301 those known from the Santacruzian [late Early Miocene], closer to the Araucanian [Late  
302 Miocene-Pliocene] species and...to the line leading to *Myrmecophaga* than *Tamandua*’  
303 (Hirschfeld, p. 421). For this author, many postcranial traits of *N. borealis* are intermediate  
304 between *Tamandua* and *Myrmecophaga*. As a questionable methodological aspect, it is  
305 important to note that Hirschfeld did not make osteological comparisons with the southern  
306 species of *Neotamandua*, only with postcranium of *Protamandua*, *Tamandua* and  
307 *Myrmecophaga* (extant species of the two latter genera).

308 In implicit reply to Hirschfeld (1976), Patterson et al. (1992) highlighted the morphological  
309 similarities between the unpublished skull FMNH P14419, catalogued as *N. conspicua* in  
310 the Field Museum, and the modern skulls of *Myrmecophaga*. For these authors, FMNH  
311 P14419 only differs from skulls of the living giant anteater in its smaller size.  
312 Consequently, Patterson et al. (1992) suggested synonymize *Neotamandua* and

313 *Myrmecophaga*, with nomenclatural priority for the latter. Nevertheless, Gaudin &  
314 Branham (1998) provided (weak) support for the validity of *Neotamandua* through a  
315 comprehensive phylogenetic analysis of Vermilingua. Their results indicate that  
316 *Neotamandua* is an independent taxon based on two autapomorphies, being one of them  
317 ambiguous and the other one unambiguous. The latter is the horizontal inclination of the  
318 glenoid. In the only most parsimonious tree recovered by Gaudin & Branham (1998),  
319 *Neotamandua* is closely related to *Myrmecophaga*, not *Tamandua*, as opposed to Rovereto  
320 (1914) and Kraglievich (1940).

321 Finally, the last species referred, with doubt, to the genus was *N.? australis* (Scillato-Yané  
322 & Carlini 1998). The holotype of this species consists only of a humerus (MLP 91-IX-6-5)  
323 collected in the lower Middle Miocene of the Río Negro Province, Argentina. Scillato-Yané  
324 & Carlini (1998) highlighted some similarities of this material with the humerus of  
325 *Tamandua*. They also expressed considerably uncertainty in assigning it to *Neotamandua*,  
326 not only by its fragmentary nature, but from the idea of Hirschfeld about the non-natural  
327 (i.e. non-monophyletic) status of this genus. Without performing a phylogenetic analysis,  
328 these authors proposed a hypothesis that *N. borealis* is closely related to *Myrmecophaga*,  
329 while *N. conspicua* and *N.? australis* are closer to *Tamandua*. If this hypothesis is correct,  
330 *N. borealis* does not belong to *Neotamandua* as consequence of the application of the  
331 nomenclatural priority principle.

332 In summary, multiple historical factors, including the lack of a diagnosis, insufficient  
333 number of anatomically correlatable/highly diagnostic postcranial elements and, especially,  
334 absence of cranial-postcranial associations, aroused the relatively arbitrary use of  
335 *Neotamandua* as a wastebasket taxon, i.e. a residual genus deriving from weak and/or

336 inadequate systematic analysis. According to the conceptual model of Plotnick & Warner  
337 (2006), *Neotamandua* has five (from a total of seven) properties of a genus potentially  
338 classifiable as wastebasket: (1) it is an old name (i.e. more than one century to the present);  
339 (2) it is [relatively] rich in species (five species, i.e. the most speciose extinct genus of  
340 Vermilingua); (3) it has a [relatively] high number of occurrences; (4) it has wide temporal  
341 and geographical distributions; (5) it [primarily] groups together specimens poorly  
342 preserved and/or difficult to identify. To these five properties we may add the lack of a  
343 diagnosis, which is related in some way to the property number two of the Plotnick-Warner  
344 model, i.e. genera diagnosed from generalized characters, probably plesiomorphies or easily  
345 recognizable characters.

346 As it was shown, *Neotamandua* has been invoked as a directly ancestral form of  
347 *Tamandua*, or, more recently, of *Myrmecophaga*, from its morphological characteristics in  
348 common with these two extant genera. But precisely because of this character mosaic, the  
349 generic allocation of isolated postcranial remains of myrmecophagids potentially referable  
350 to *Neotamandua* should not be reduced or exclusively focused on their comparison with the  
351 crown-group, but should also consider the effect of possible homoplasies (e.g. those related  
352 to ecological convergences), plesiomorphies and limitations of the fossil record (Plotnick &  
353 Warner 2006). In other words, the apparent affinity between isolated postcranial elements  
354 of any Neogene anteater and their homologous in *Myrmecophaga* is not enough to make a  
355 reliable generic allocation in *Neotamandua*; diagnostic information of the latter genus is  
356 needed, preferably autapomorphies, which allow it to be individually identified and not  
357 simply as a set of forms similar to *Myrmecophaga*.

358



359 **Comparisons between northern and southern species referred to *Neotamandua***

360 ***N. borealis* and *N. greslebini*.** See the Table 2 for comparison of postcranial measurements  
361 between these species.

362 **Radius.** Both *N. borealis* and *N. greslebini* show two longitudinal, parallel radial  
363 ridges, of which the lateral ridge is higher and reaches a more distal level than the  
364 cranial one. This is similar to the condition observed in *Myrmecophaga* and differs  
365 from the distally convergent radial ridges of *Tamandua*. In *N. borealis*, the lateral  
366 ridge is even more distally extended than in *N. greslebini*, in such a way that the  
367 flanks of this structure contact the lateral border of the styloid process. According to  
368 Kraglievich (1940), in the Argentinean species this ridge ends at an intermediate level  
369 between the distal end of the cranial ridge and the styloid process.

370 **Tibia.** The type material of *N. borealis* includes a proximal epiphysis and part of the  
371 diaphysis of a right tibia. According to Kraglievich (1940), the holotype of *N.*  
372 *greslebini* includes two fragments of a tibia, one of them proximal and the other one  
373 distal. Both Hirschfeld and Kraglievich claimed greater overall similarity between the  
374 tibial fragments of these species and the homologous parts of *Tamandua*, rather than  
375 *Myrmecophaga*. This way, the mid-section of the tibiae both of *N. borealis* and *N.*  
376 *greslebini* is not as strongly triangular as in *Myrmecophaga*. Rather, this bone  
377 segment is from gently triangular to sub-rounded in these two species referred to  
378 *Neotamandua*, without being rounded as in *Tamandua*.

379 **Astragalus.** Hirschfeld (1976) described the astragalus of *N. borealis* (Fig. 4A-B, 4E-  
380 F) as intermediate in morphology and size between those in *Tamandua* and

381 *Myrmecophaga*. In contrast, Kraglievich (1940) stated that the astragalus of *N.*  
382 *greslebini* closely resembles that of *Tamandua*. New observations allow to  
383 determinate that, in dorsal view, the astragalus of *N. borealis* is more similar to that in  
384 *Tamandua* than *Myrmecophaga* as consequence of a lateral side of the trochlea larger  
385 than the medial one (trochlear asymmetry). Like *N. greslebini*, the regular concavity  
386 in which is inserted the *flexor digitorum fibularis* tendon extends posteroventrally  
387 like a well-defined wedge (“pointed shape” in Kraglievich’s words) and it contacts  
388 the calcaneal facets across the entire width of the latter. In ventral view, the  
389 arrangement of the calcaneal facets in *N. borealis* is a kind of ‘transition’ between  
390 that in *Myrmecophaga* and *Tamandua*. In *N. borealis*, the ectal and sustentacular are  
391 largely separated by a wide and deep sulcus, but there is an incipient connection. This  
392 condition is approximately comparable to that described by Kraglievich (1940) for *N.*  
393 *greslebini* and differs from the fully separated calcaneal facets in *Protamandua* and  
394 *Tamandua*. In this sense, Kraglievich was not very explicit in pointing out the degree  
395 of development of the connection between these facets, but it is inferred that it is not  
396 exactly wide as in *Myrmecophaga* when he wrote that ‘...these calcaneal articulations  
397 are, *apparently*, posteriorly fused...’ (italics are ours; Kraglievich, p. 635).

398 **Calcaneum.** Like *N. greslebini*, *N. borealis* has a narrow fibular calcaneal facet,  
399 which is located laterally and in a slightly different plane with respect to that of the  
400 ectal facet (Fig. 4C-D, 4G-H). In both of the former species, the *sustentaculum* is less  
401 medially projected than in *Myrmecophaga*. They also show an accessory facet in the  
402 anterior end of the calcaneum that articulates with the astragalar head, similarly to  
403 *Tamandua*. In all the aforementioned taxa, this facet is closer (even in contact) to the

404 cuboid facet. In *N. borealis* and *N. greslebini*, the cuboid facet is transversely ovate  
405 and concave. A unique feature in common for them is the presence of a short  
406 tendinous groove (shorter than in *Myrmecophaga*) and strongly concave (Fig. 4H). It  
407 is the continuation of the longitudinal and conspicuous ridge that runs the calcaneum  
408 in its lateral side. The latter separates tendons of the *fibularis longus* and *accessorius*  
409 muscles (Hirschfeld 1976; Gambaryan et al. 2009). In *N. borealis*, this ridge is more  
410 conspicuous than in *Tamandua* and less than in *Myrmecophaga* [Insert Fig. 4 here].

411

412 ***N. borealis* and *Neotamandua* sp.** See the Table 3 for comparison of postcranial  
413 measurements between these species.

414 **Radius.** The distal epiphysis of the radius in *Neotamandua* sp. (MACN 2408) is more  
415 massive than that in *N. borealis*. In the latter species, the distal end of the radius is  
416 relatively stylized, like *Tamandua*. However, the morphologies of *N. borealis* and  
417 *Neotamandua* sp. are more comparable between them. In distal view, the styloid  
418 process of these species is more elongated and posteriorly oriented than in  
419 *Tamandua*. In the latter extant genus, the transverse axis (longer axis) of the facet for  
420 distal articulation is forming an angle close to 45° with respect to the plane of the  
421 anterior side of the radius, while this axis is nearly parallel with respect that plane in  
422 *N. borealis* and *Neotamandua* sp. This difference gives to the distal radius of the  
423 compared *Neotamandua* species a non-rotated appearance, unlike the same epiphysis  
424 in *Tamandua*. In anterior view, the distal articulation facet of *N. borealis* and  
425 *Neotamandua* sp. is visible in wedge shape pointing towards the medial border.  
426 Additionally, in the same view, this facet exhibits comparable exposures in both of

427 the latter species, considerably more than in *Tamandua*. The posterior side of the  
428 distal epiphysis is from flat to slightly concave in *N. borealis* and *Neotamandua* sp.,  
429 unlike the convex posterior side in *N. greslebini* (this observation could suggest that  
430 the material of *Neotamandua* sp. is not the holotype of *N. greslebini*, as speculated by  
431 McDonald et al. 2008) and *Tamandua*. The distal extension of the lateral ridge in *N.*  
432 *borealis* and *Neotamandua* sp. is similar.

433 **Astragalus.** The astragalus of *Neotamandua* sp. (MACN 2406) is only represented  
434 by the astragalar body. The medial trochlea is smaller than the lateral trochlea, but  
435 this asymmetry is less than in *N. borealis*. In addition, these sections of the trochlea  
436 are proportionally less separated in the latter species than in *Neotamandua* sp.

437 **Calcaneum.** The calcaneum is fragmentary in *Neotamandua* sp. (MACN 2411). As  
438 in the case of the astragalus, the preserved portion is the bone body. The ectal facet is  
439 sub-triangular in shape in *Neotamandua* sp., while it is approximately sub-oval in *N.*  
440 *borealis*. The sustentacular facet is more medially extended in the latter species than  
441 in *Neotamandua* sp. In both species, the cuboid facet is partially visible in dorsal  
442 view, particularly in *Neotamandua* sp. In the same view, the lateral ridge is slightly  
443 exposed in *N. borealis*, but not so in *Neotamandua* sp.

444 **Discussion.** The former comparisons allow to recognize a few morphological similarities  
445 and differences between homologous postcranial elements of *N. borealis*, *N. greslebini* and  
446 *Neotamandua* sp. It is considered that some similarities in these species are potentially  
447 diagnostic at the genus level, namely the sub-rounded to gently triangular shape of the tibial  
448 mid-section; ectal and sustentacular facets incipiently connected in the astragalus; and a  
449 short tendinous groove in the lateral side of the calcaneum (Table 4). These similarities

450 seem to provide support to the hypothesis that these northern and southern South American  
451 species referred to *Neotamandua* are closely related and, consequently, that they are  
452 correctly included in the same genus. Alternatively, these common features could be  
453 symplesiomorphies of a hypothetical lineage of myrmecophagids more late diverging than  
454 *Protamandua* and apparently closer to *Myrmecophaga* than *Tamandua*. Provisionally, from  
455 the analysis presented, it is proposed to circumscribe the genus *Neotamandua* to the  
456 nominal species *N. conspicua* (type species), *N. greslebini* and *N. borealis*. Since *N. magna*  
457 and *N. ? australis* are doubtfully assigned to *Neotamandua* or its allocation in this genus has  
458 been seriously questioned (McDonald et al. 2008; this work), they are considered *species*  
459 *inquirendae*, following the International Code of Zoological Nomenclature (Ride et al.  
460 1999). To denote the questionable generic allocation of *N. magna* is suggested the use of  
461 inverted commas, i.e. ‘*N.*’ *magna*. The material referred to *Neotamandua* sp. seems  
462 correctly referred to this genus, but it should be further tested. It is possible that these  
463 specimens correspond to a new species.

464 The diagnosis for *Neotamandua* proposed below is largely based on the designation of the  
465 specimen FMNH P14419 as epitype for the type species, *N. conspicua*, after considering  
466 the fragmentary nature of the holotype of this taxon (MACN 8097; Rovereto 1914), and,  
467 consequently, its ambiguity or lack of some taxonomically relevant features, particularly in  
468 the rostrum. In addition, the potentially diagnostic postcranial features for *Neotamandua*  
469 that has been identified above are also incorporated in the new diagnosis until cranial-  
470 postcranial associations are found and studied.

471

472

*Neotamandua* Rovereto, 1914

473 *LSID*. urn:lsid:zoobank.org:act:4EC0ABE1-C013-4113-9956-5DBD6E79FCEA

474 **Type species.** *N. conspicua* Rovereto, 1914.

475 **Other referred species.** *N. greslebini* Kraglievich 1940; *N. borealis* Hirschfeld 1976.

476 **Related species inquirendae.** ‘*N.*’ *magna* Ameghino 1919 (*Myrmecophaga magna* new  
477 combination? See McDonald et al. 2008); *N.?* *australis* Scillato-Yané & Carlini 1998.

478 **Diagnosis.** Middle-to-large sized myrmecophagid, larger than *Tamandua* but smaller than  
479 *Myrmecophaga*. It can be differentiated from other vermilinguans by the following  
480 combination of characteristics: in dorsal view, rostrum strongly tapered towards its anterior  
481 end (more than in any other myrmecophagid), with a regular transition in width from the  
482 anterior portion of frontals to the anterior end of nasals; reduced lacrimal which is not part  
483 of the orbit; jugal inserted in posteroventral position with respect to the lacrimal and  
484 slightly projected in posterodorsal direction; frontal forming a dorsal dome at the orbit  
485 level; hard palate well extended towards the posterior end of the skull, close to the ventral  
486 border of the occipital condyles; squamosal (= posterior) zygomatic process dorsally  
487 inclined; presence of palatine “wings”; horizontal inclination of the glenoid (Gaudin &  
488 Branham 1998); sub-oval to gently triangular shape of the tibial mid-section; ectal and  
489 sustentacular facets incipiently connected in the astragalus; short tendinous groove in the  
490 lateral side of the calcaneum.

491

492 *Neotamandua conspicua* Rovereto, 1914

493

(Fig. 5)

494 *LSID*. urn:lsid:zoobank.org:act:C4DC62D5-6470-4A04-B152-D42ED3BA332C

495 **Holotype.** MACN 8097, posterior portion of a skull.

496 **Epitype.** FMNH P14419, nearly complete skull but with fractured rostrum and partially  
497 eroded frontals and parietals.

498 **Geographical and stratigraphic provenance.** MACN 8097 is from an indeterminate  
499 locality in the Santa María Valley, Catamarca Province, Argentina (Rovereto 1914).

500 Probably Andalhuala Formation. Upper Miocene (McDonald et al. 2008; Bonini 2014;  
501 Esteban et al. 2014).

502 FMNH P 14419 is from the Corral Quemado area, Catamarca Province, Argentina. Corral  
503 Quemado Formation. Lower Pliocene (Bonini 2014; Esteban et al. 2014). This specimen  
504 was collected by Robert Thorne and Felipe Méndez during the Second Captain Marshall  
505 Field Palaeontological Expedition, which was led by Elmer S. Riggs and developed in  
506 Argentina and Bolivia in 1926–1927 (Simpson, pers. comm.; Riggs 1928). In the Field  
507 Museum, where it is deposited, has been catalogued as *N. conspicua*. No known reference  
508 publication exists as support for the taxonomic assignation to this species, except in Gaudin  
509 & Branham (1998) and, now, in this work from direct comparison with the holotype.

510 **Diagnosis.** See the diagnosis for *Neotamandua* above. The postcranial diagnostic features  
511 included there do not belong to material known for this species.

512 **Comparative description of the epitype.** The skull FMNH P14419 is anteroposteriorly  
513 elongated, with a general architecture more similar to that in *Myrmecophaga* than  
514 *Tamandua*. The cranial measurements taken for this specimen are shown in the Table 1. In  
515 dorsal view, both the rostrum, in general, as well as the nasals, in particular, are anteriorly

516 tapered. The pre-orbital section of the frontals is proportionally less elongated than in  
517 *Myrmecophaga*. The lacrimal has a sub-triangular outline and its anteroposterior and  
518 dorsoventral lengths are similar, unlike *Myrmecophaga*, in which the lacrimal is triangular  
519 and more anteroposteriorly elongated. The insertion of the jugals is more ventral and  
520 posterior than in *Myrmecophaga* and even more than *Tamandua*. Each jugal is slightly  
521 tapered by mediolateral compression in its posterior end and it is posterodorsally projected,  
522 instead of posteroventrally like *Myrmecophaga*. The posterolateral process of the maxilla  
523 contacts the entire anterior and ventral borders of the lacrimal. The orbital ridge is less  
524 prominent than in *Myrmecophaga*. The superior orbital wall is laterally expanded, forming  
525 a roof more developed than in *Myrmecophaga*. At the orbit level, the palatines are also  
526 laterally expanded, forming palatine “wings”. These structures make the anterior hard  
527 palate look wider than the posterior palate. The posterior end of the hard palate is less  
528 ventrally projected, unlike *Tamandua* and *Myrmecophaga*. In lateral view, the squamosal  
529 zygomatic processes are dorsally inclined, unlike the ventral inclination of the same bone  
530 projection in *Tamandua* and *Myrmecophaga*. This feature would be a convergence with  
531 *Cyclopes*. The braincase is proportionally larger than in *Myrmecophaga*, but smaller than in  
532 *Tamandua*. The tympanic bulla is less developed than in *Tamandua*. The external auditory  
533 meatus has subcircular to circular shape, like *Myrmecophaga* (ovated in *Tamandua*). In *N.*  
534 *conspicua* the same opening is located in a posterodorsal position, like *Myrmecophaga* and  
535 in contrast with *Tamandua*, in which it has an anterodorsal position. Despite the  
536 palatopterygoid suture is not well preserved, appears to be more similar to the irregular  
537 suture in *Myrmecophaga*, with a posteriorly opened, asymmetrical “V” shape, than the  
538 regular suture in *Tamandua*, with an anteriorly opened, symmetrical “V” shape. There is no



539 interpterygoid vacuity in which it could be established a soft palate, like *Myrmecophaga*.  
540 The occipital condyles are proportionally larger than in *Myrmecophaga* [Insert Fig. 5 here].

541

## 542 **Discussion**

### 543 **Systematic implications**

544 This work includes the first description of a new, valid extinct genus for  
545 Myrmecophagidae in the last century, i.e. Gen. nov. Likewise, it constitutes a novel  
546 taxonomic comprehensive reassessment for *Neotamandua* from Hirschfeld (1976). The  
547 results suggest that there are still critical gaps in our knowledge on the composition and  
548 diversity of the Neogene assemblages of these xenartrons, particularly in the tropical region  
549 of South America. With the inclusion of Gen. et sp. nov. (Fig. 6), Myrmecophagidae now  
550 comprises at least five genera (three of them fully extinct) and 11 nominal species (eight  
551 extinct species), namely [the dagger means extinct species]: *Protamandua rothi*<sup>†</sup>;  
552 *Neotamandua? australis*<sup>†</sup>; *Neotamandua borealis*<sup>†</sup>; Gen. et sp. nov.<sup>†</sup>; ‘*Neotamandua*’  
553 *magna*<sup>†</sup>; *Neotamandua greslebini*<sup>†</sup>; *Neotamandua conspicua*<sup>†</sup>; *Myrmecophaga*  
554 *caroloameghinoi*<sup>†</sup>; *Myrmecophaga tridactyla*; *Tamandua tetradactyla*; and *Tamandua*  
555 *mexicana*. Of these taxa, only two genera and two species have fossil occurrence in  
556 northern South America: *N. borealis* (Middle Miocene of Colombia; Hirschfeld 1976) and  
557 Gen. et sp. nov. (Middle Miocene of Colombia; this work) (Fig. 7). The latter taxon is a  
558 small-to-middle sized myrmecophagid, comparable but slightly smaller than *Tamandua*.  
559 The general morphology of the skull of this new anteater resembles more to that of  
560 *Tamandua* than any other known taxon. It shows remarkable features such as: (1) strongly

561 tapered nasals toward its anterior rostrum; (2) relatively low rostrum and anterior section of  
562 frontals; (3) large pre-orbital section of frontals; and (4) strongly triangulated (anterior)  
563 lacrimal. The tapering of nasals is a characteristic in common with *N. conspicua*, but in the  
564 latter species the entire rostrum is tapered, not only the nasals, like Gen. et sp. nov. The  
565 relatively low rostrum and anterior section of frontals seems to indicate a plesiomorphy,  
566 given that this feature is apparently present in *P. rothi*. A large pre-orbital section of  
567 frontals is shared, in (nearly) extreme condition, by *N. conspicua* and, especially,  
568 *Myrmecophaga*, but it should be noted that in Gen. et sp. nov. there is no such as elongated  
569 skull. And, finally, the strongly triangulated (anterior) lacrimal in the latter species is  
570 superficially similar to that in *Myrmecophaga*. Estimates of cranial measurements and  
571 features (rostrum length, exposure of the maxilla in the orbit and curvature of the  
572 basicranial-basifacial axis) used for coding the characters with numbers 4, 8, 9 and 42 of  
573 the character list by Gaudin & Branham (1998), allow tentatively infer the phylogenetic  
574 position of Gen. et sp. nov. as a taxon included within the clade *Tamandua* + *Neotamandua*  
575 + *Myrmecophaga* and located in a polytomy with *Tamandua*. Under this preliminary  
576 phylogenetic analysis, which is not presented in the results section because there is no  
577 enough information for coding the new taxon, *Protamandua* is well supported as the most  
578 basal myrmecophagid as consequence of sharing several character states with non-  
579 Myrmecophagidae Vermilingua (i.e. *Cyclopes* and *Palaeomyrmidon*; for more details, see  
580 Gaudin & Branham 1998). For future studies, it is tentatively suggested the subfamilial  
581 name “Myrmecophaginae” for all the Myrmecophagidae more late diverging than  
582 *Protamandua*, including possibly Gen. et sp. nov. In this sense, new and more complete  
583 material referable to the latter taxon is required to shed light on its phylogenetic position  
584 [Insert Fig. 6 here].

585 On other hand, the taxonomic analysis of *Neotamandua* and its referred species indicates  
586 that these taxa were based on a poorly supported taxonomy. Other case of extinct  
587 vermilinguans with flawed systematics in low levels of the taxonomic hierarchy was noted  
588 by McDonald et al. (2008) with regard to genera and species proposed from isolated  
589 postcranial elements of putative myrmecophagids or even members of new, distinct  
590 families from the Early Miocene of Santa Cruz, southern Argentina. These authors,  
591 partially based on comparisons by Hirschfeld (1976), argued that the number of taxa  
592 claimed for that area and interval (seven genera and nine species; e.g. *Promyrmephagus*,  
593 *Adiastaltus*; Ameghino 1894) has been artificially inflated, even though it is still possible to  
594 revalidate taxa other than the well validated species *P. rothi* (McDonald et al. 2008). All  
595 these research problems in systematics imply the need to regularly reevaluate the taxonomy  
596 of extinct anteaters through reexamination, when possible, of previously described material  
597 and the study of new specimens. While it is true that the fossil record of Vermilingua is  
598 poor and fragmentary in comparison, for instance, with that of other xenartrons such as  
599 Tardigrada, the sampling effort should be increased in order to have greater recovery of  
600 fossil material for this group, especially in areas known for their preservation potential (e.g.  
601 southern and northwestern Argentina, southwestern Colombia).

602 The reevaluation of the taxonomic status of *Neotamandua* found that there was no  
603 diagnosis for this genus. The newly proposed diagnosis includes multiple cranial and  
604 potential postcranial characteristics, which uphold that *Neotamandua*, independently  
605 whether it is a natural group or not, certainly contains species that do not belong to  
606 *Myrmecophaga*, despite their great resemblance with the latter. This outcome is congruent  
607 with the taxonomic opinion of Gaudin & Branham (1998) and is at odds with Patterson et

608 al. (1992). Now, can we confidently say that *Neotamandua* is monophyletic from current  
609 evidence? *Neotamandua*, as previously defined by other workers, may be composed of  
610 successive basal species or genera in relation to the hypothetical clade of *Myrmecophaga*  
611 (i.e. *My. tridactyla* + *My. caroloameghinoi*). If that is correct, *Neotamandua* would be  
612 paraphyletic by definition, since it excludes some of its descendants (Serenó et al. 1991).  
613 This possible pattern of basal paraphyly is consequence of a taxonomy not defined by  
614 clades, but grades (Huxley 1958; Wood & Lonergan 2008). The monophyly of  
615 *Neotamandua*, as was redefined here (i.e. *N. conspicua* + *N. greslebini* + *N. borealis*), is  
616 tentatively supported by three potential synapomorphies shared by two of its species whose  
617 postcranium is known (*N. greslebini* and *N. borealis*): (1) sub-oval to gently triangular mid-  
618 section of the tibia; (2) ectal and sustentacular facets incipiently connected in the  
619 astragalus; (3) short tendinous groove in the lateral side of the calcaneum. However, the  
620 synapomorphic condition of these features for *Neotamandua* need to be further tested from  
621 systematic analysis of new, more complete and/or associated material of Gen. et sp. nov.  
622 and species referred to *Neotamandua*. That would allow to assess more adequately the  
623 global morphological variability and character distribution in Miocene myrmecophagids  
624 more late diverging than *Protamandua*. In turn, knowing this distribution better, it is more  
625 likely to disentangle the taxonomic identities and affinities of the *Neotamandua* species in  
626 order to corroborate the monophyly of this genus. For the moment, the hypothesis of  
627 Hirschfeld (1976) that *Neotamandua* is not monophyletic is, in principle, less probable if  
628 the *species inquirendae* '*N.*' *magna* and *N.?* *australis* are excluded from the genus, as it  
629 was decided here, than if they are retained within it. The exclusion of the *species*  
630 *inquirendae* does not affect the hypothesis that *Neotamandua* is closer to *Myrmecophaga*  
631 than any other known nominal genus. Consequently, the type species of *Neotamandua*, *N.*

632 *conspicua*, is reiterated as closer to *Myrmecophaga* than *Tamandua*, in line with the  
633 phylogeny of Gaudin & Branham (1998) and unlike the hypothesis of Carlini & Scillato-  
634 Yané (1998).

635 Finally, the material referred to *Neotamandua* sp. and used in this study to make  
636 comparisons with *N. borealis*, seems correctly allocated in that genus, but it might  
637 eventually be assigned to a new species with very large body size, larger than *N. greslebini*.  
638 This is partially conditioned to the clarification of the taxonomic status of '*N.*' *magna*,  
639 which is a species comparable in body size to *Neotamandua* sp., so they could be (or not)  
640 the same taxon.

641

#### 642 **The diversification of Myrmecophagidae**

643 McDonald et al. (2008) pointed out that since the highly incomplete fossil record of  
644 Vermilingua, several fundamental questions on the evolution of this group, including  
645 morphological trends and the acquisition of ecological preferences in its distinct taxa, are  
646 largely unknown. Likewise, they highlighted some uncertainty related to the divergence  
647 times of possible sub-clades. However, several inferences and hypotheses about the  
648 evolutionary history of anteaters and, particularly, the myrmecophagids, can be outlined  
649 from the current evidence, including that presented in this work. Following to Pascual &  
650 Ortiz-Jaureguizar (1990), McDonald et al. (2008) and Toledo et al. (2017), the next  
651 discussion is based on multiple palaeobiological, ecological and biogeographical aspects as  
652 major constraints and/or consequences of the myrmecophagid evolution.

653 The diversification of Myrmecophagidae was an macroevolutionary event that occurred  
654 through the Neogene, at least as early as the Burdigalian (Early Miocene), according to the  
655 minimal age estimated for the most basal genus, i.e. *Protamandua*. The beginning of this  
656 diversification is approximately overlapped in time with the onset or development of  
657 similar events in other higher taxa in South America, such as the xenartrans  
658 Megatherioidea, Mylodontidae, Glyptodontidae and Dasypodini (Croft et al. 2007;  
659 McDonald & De Iuliis 2008; Bargo et al. 2012; Carlini et al. 2014; Boscaini et al. 2019), or  
660 the South American native ungulates Pachyrukhinae, Mesotheriinae and Toxodontidae  
661 related to *Pericotoxodon* and *Mixotoxodon* (Seoane et al. 2017; Armella et al. 2018a;  
662 Armella et al. 2018b). This pattern shows the importance of the Early Miocene, particularly  
663 the Burdigalian, as a critical interval for the diversification of multiple South American  
664 land mammal lineages. In light of the geographical provenance of *Protamandua*, the most  
665 probable ancestral area for Myrmecophagidae is southern South America (Fig. 7). The  
666 palaeoenvironmental conditions inferred for the Early Miocene of this area are considerably  
667 warmer and more humid (1000–1500 mm/year) than today, with presence of a subtropical  
668 dry forest (Iglesias et al. 2011; Quattrocchio et al. 2011; Kay et al. 2012; Brea et al. 2017;  
669 Raigenborm et al. 2018). In line with this reconstruction, Palazzesi et al. (2014), using a  
670 rarefied richness analysis from palynological evidence, reported that southern Argentina  
671 harboured in the Early Miocene a plant richness comparable to that documented today for  
672 the Brazilian Atlantic Forest, in southeastern Brazil. Similar to *Tamandua*, *Protamandua*  
673 would have preferred forested habitats and would have had semiarboreal habits (Gaudin &  
674 Branham 1998; McDonald et al. 2008; Kay et al. 2012). Whether the ancestral condition of  
675 substrate use in Myrmecophagidae is arboreal, as held by Gaudin & Branham (1998), the  
676 preference for open biomes (e.g. savannah) and terrestriality in *Myrmecophaga* (and

677 possibly in *Neotamandua*) is a derived condition (McDonald et al. 2008; Toledo et al.  
678 2017). The semiarborescent habits of *Tamandua* are explained from niche conservatism or,  
679 alternatively, from convergence with *Protamandua* if the ancestor of *Tamandua* was  
680 hypothetically terrestrial [Insert Fig. 7 here].

681 Since their particular, low basal metabolic rates and myrmecophagous diets (McNab 1984,  
682 1985), it is likely that the global warm recovery during the early Neogene (Early Miocene  
683 to early Middle Miocene; including the Middle Miocene Climatic Optimum or MMCO;  
684 Fig. 8), linked to latitudinal temperature gradient reduction and expansion of the tropical  
685 (warm) forest belt towards higher latitudes in the continents (including South America; see  
686 Anderson 2009; Herold et al. 2011; Morley 2011; Palazzesi et al. 2014), has influenced on  
687 the evolutionary differentiation of the myrmecophagids, maybe predominantly *in situ* as in  
688 the climatically-induced evolution of other small Cenozoic mammals (Fortelius et al.  
689 2014), such as *Protamandua*. This differentiation would have been triggered by increase in  
690 suitable area in terms of preferred biomes (warm forests in this case) and, especially,  
691 temporarily sustained availability of social insects for their feeding (McDonald et al. 2008;  
692 Kay et al. 2012; Toledo et al. 2017). Indeed, extant termites and ants (Termitidae and  
693 Formicidae, respectively) concentrate the vast majority of their biomass (and species  
694 richness) in the tropics and warm subtropical regions (Hölldobler & Wilson 1990; Tobin  
695 1995; Davidson & Patrell-Kim 1996; Eggleton et al. 1996; Davidson et al. 2003; Ellwood  
696 & Foster 2004; Keller & Gordon 2009). This ecogeographical pattern is consistent with the  
697 fossil record of the former higher taxa, which shows a strong tropical niche conservatism  
698 from their respective evolutionary origins in the Late Cretaceous/Early Paleogene (see

699 below; Archibald et al. 2011; LaPolla et al. 2013; Guénard et al. 2015; Bourguignon et al.  
700 2017).

701 According to Blois & Hadly (2009), the responses of mammalian taxa to climate change  
702 throughout the Cenozoic are causally interconnected. These responses at the level of  
703 individual taxa may include changes in abundance, genetics, morphology and/or  
704 distributional range, and they may instigate multitaxa responses such as diversification  
705 events comparable to that placed on the root of the evolutionary tree of Myrmecophagidae.  
706 This case of a cladogenetic event possibly induced by climate contrasts in kind of biome  
707 with those that have been repeatedly documented for intervals of grassland expansion (e.g.  
708 Equidae, Bovidae, Cervidae, Ochotonidae, Hippopotaminae; MacFadden 2000;  
709 Bouchenak-Khelladi et al. 2009; Boisserie & Merceron, 2011; Ge et al. 2013).

710 In the Middle Miocene, *N. ? australis*, *N. borealis* and Gen. et sp. nov. exhibit a mosaic of  
711 morphological features in common with *Tamandua* and/or *Myrmecophaga*, as well as some  
712 exclusive characteristics, which suggest an early, important increase in morphological  
713 disparity in Myrmecophagidae and possibly the evolutionary divergence of those lineages  
714 comprising its crown-group. This coincides with the interpretation of Hirschfeld (1976),  
715 according to which the lineages including the extant genera of Myrmecophagidae  
716 differentiated morphologically at least from the Friasian (Middle Miocene). Same way, it is  
717 compatible with the results of the molecular phylogenies by Delsuc et al. (2001, 2012) and  
718 Gibb et al. (2016), which estimated that the evolutionary divergence of *Tamandua* and  
719 *Myrmecophaga* occurred in the late Middle Miocene, c. 13 mya. On the other hand, relative  
720 body sizes inferred for the Middle Miocene taxa show an apparent trend towards increase in  
721 body size in comparison with the basal taxon *Protamandua*. During this interval, the



722 myrmecophagids have a wide geographical distribution in South America (Fig. 7), from  
723 low to medium-high latitudes. This is in line with the evolution of larger body sizes since  
724 when this attribute increases, the foraging area also increases and, with it, the distributional  
725 range, according the general foraging strategy of the extant myrmecophagids (Naples 1999;  
726 Toledo et al. 2017; Gaudin et al. 2018). The co-occurrence pattern of *N. borealis* and Gen.  
727 et sp. nov. in La Venta area in Colombia constitutes the earliest pattern of this kind for  
728 Myrmecophagidae until pending systematic revisions for putative taxa from the Early  
729 Miocene of Santa Cruz, Argentina, are carried out. These revisions would allow to  
730 determine whether there are two or more co-occurrent myrmecophagid taxa in the latter  
731 area. Given that *N. borealis* and Gen. et sp. nov. probably are not sister taxa, it would imply  
732 a non-sympatric diversification followed by dispersal of at least one of the involved taxa.  
733 The habitat preference of Gen. et sp. nov. in the palaeoenvironmental mosaic of La Venta  
734 area (Kay & Madden 1997; Spradley et al. 2019) is speculated as tropical forest  
735 (semiarboreal?) by analogy with *Protamandua*, while it is proposed a more generalized  
736 habitat selection for *N. borealis* in line with the palaeobiological inference of  
737 predominantly terrestrial locomotion for the latter taxon by Hirschfeld (1976). If this hold  
738 true, opens the possibility that *N. borealis* is the oldest myrmecophagid inhabiting zones  
739 with semi-open or even open vegetation (see below).

740 The morphological and probably taxonomic diversification of Myrmecophagidae continued  
741 in the Late Miocene. Inferred body sizes range from larger than *Tamandua* and nearly  
742 comparable to *Myrmecophaga*. Considering the wide geographical distribution during the  
743 Middle Miocene, there is probably a geographical bias in the fossil record of the  
744 myrmecophagids during the Late Miocene as the only known occurrences are

745 *Myrmecophaga*-like forms from northwestern Argentina (Fig. 7). If *N. borealis* and *N.*  
746 *greslebini* are sister taxa, as it seems, that means there was a biogeographical connection  
747 for Myrmecophagidae between northern and southern South America in the late  
748 Middle/early Late Miocene. This inference is congruent with the palaeobiogeographical  
749 analyses of Cozzuol (2006) and Carrillo et al. (2015), according to which the affinities  
750 between several Late Miocene, northern and southern South American land mammal  
751 assemblages are strong or, at least, not so distant as those between Middle Miocene  
752 assemblages from the same regions. This pattern might be explained from the geographical  
753 shrinks of the Pebas Mega-Wetland System and the Paranean Sea in the Middle-Late  
754 Miocene transition (Aceñolaza & Sprechmann 2002; Cozzuol 2006; Salas-Gismondi et al.  
755 2015). It is also possible that the expansion of open biomes in South America during the  
756 Late Miocene has facilitated this biotic connection, as has been acknowledged in the case  
757 of other mammal taxa (e.g. Glyptodontinae, a xenartran group like Myrmecophagidae;  
758 Ortiz-Jaureguizar & Cladera 2008; Oliva et al. 2010). Indeed, from a palaeoenvironmental  
759 viewpoint, the (partial?) co-occurrence of '*N.*' *magna*, *N. greslebini* and *N. conspicua* in  
760 northwestern Argentina is important inasmuch as this pattern is related, for the first time in  
761 the evolutionary history of Myrmecophagidae, to savannahs well developed with respect to  
762 other kinds of vegetation cover (Latorre et al. 1997; Brandoni et al. 2012; Cotton et al.  
763 2014; Amidon et al. 2017; Zimicz et al. 2018). On the basis of the foregoing and by  
764 generalization of morphological and ecological features of the living vermilinguans, e.g.  
765 less dependence on trees related to greater taxonomic and/or ecological diversity of  
766 consumed insects (Hirschfeld 1976; Montgomery 1985a; Rodrigues et al. 2008; Toledo et  
767 al. 2017; Table 5), it is hypothesized that, as early as the late Middle Miocene, with the  
768 triggering of a global cooling (Fig. 8), *Neotamandua* was involved in a niche evolution

769 process within Myrmecophagidae which implied a significative increase in dietary diversity  
770 as myrmecophagous and expansion of substrate use and biome selection. Probably the  
771 species of this genus preferred the frequent use of the ground by biomechanical constraints  
772 and made inroads into largely open environments as humid savannahs, without excluding  
773 use of forested environments, like *Myrmecophaga* (Fuster et al. 2018; Gaudin et al. 2018).  
774 The former model is further supported from the evolutionary response pattern to major  
775 climatic-vegetational changes documented by Badgley et al. (2008) in a faunal sequence of  
776 mammals from the Late Miocene of southern Asia, according to which the trophic niche  
777 evolution and, particularly the expansion of this attribute, in conjunction with habitat  
778 changes, is related to increase in the probabilities of local and regional survivorship in the  
779 studied lineages [Insert Fig. 8 here].

780 On other hand, the fossil record of the crown-group genera, *Tamandua* and *Myrmecophaga*,  
781 is confined to the Pliocene-Pleistocene, but the evolutionary (morphological) divergence of  
782 *Myrmecophaga* would date back at least to the late Middle Miocene according the first  
783 appearance of *Neotamandua*, i.e. *N. borealis*. Under this assumption, the hypothesis of '*N.*'  
784 *magna* as a species of *Myrmecophaga* is perfectly feasible. In any case, the biogeographical  
785 dynamics of the two extant myrmecophagid genera may have been constrained by their  
786 respective ecological tolerances and, they, in turn, by the rapidly changing habitat and  
787 biome distribution in the Americas during at least the last five or six million years (de Vivo  
788 & Carmignotto 2004; Salzmann et al. 2011; Sniderman et al. 2016; Amidon et al. 2017;  
789 Roberts et al. 2018; Grimmer et al. 2018). This applies especially to the case of *Tamandua*  
790 since this taxon is less generalist in relation to habitat selection than *Myrmecophaga*  
791 (McDonald 2005). Considering the hypothesis of niche expansion for *Neotamandua*, the

792 differentiation of *Myrmecophaga* would have accentuated this putative evolutionary trend  
793 through stronger preference for open environments, which is consistent with the general  
794 palaeoenvironment of savannah in the Early Pliocene of the area where occurs the oldest  
795 species of the latter genus, i.e. *My. caroloameghinoi* (Zavala & Navarro 1993; McDonald et  
796 al. 2008).

797 The myrmecophagid evolution has a late episode with the complete formation of the  
798 Panama Land Bridge (PLB) in the terminal Neogene (Coates & Stallard 2013; O’dea et al.  
799 2016; Jaramillo 2018). *Myrmecophaga tridactyla* invaded and colonized Central- and  
800 southern North America (northern Mexico) at least as early as the Early Pleistocene (Shaw  
801 & McDonald 1987; Fig. 7). This dispersal event is part of the Great American Biotic  
802 Interchange (GABI), specifically the episode referred as GABI 2 (Woodburne 2010).  
803 Today, the northern boundary of this species is located in northern Central America, over  
804 3000 Km to the south of the northernmost fossil record (Gaudin et al. 2018). This  
805 distributional difference was interpreted by Shaw & McDonald (1987) from the occurrence  
806 of warmer and more humid conditions in the Early Pleistocene of southern North America  
807 (southern United States-northern Mexico) than today in the same area. These conditions  
808 would have allowed that *Myrmecophaga* colonize subtropical savannahs with permanent  
809 availability of insects included in its diet (Croxen III et al. 2007; McDonald 2005), but  
810 subsequent climatic-vegetational shifts (desertification) during the Late Pleistocene would  
811 have forced from extirpation a range shrinkage of this taxon towards lower latitudes  
812 (McDonald 2005; Ferrusquía-Villafranca et al. 2017). The distributional range pattern of  
813 tropical taxa expanded towards southern North America during some intervals of the  
814 Pleistocene has been well supported from the records of multiple taxa other than

815 *Myrmecophaga*, including mammals and sauropsids (Shaw & McDonald 1987; Moscato &  
816 Jasinski 2016; Ferrusquía-Villafranca et al. 2017).

817 Like *Myrmecophaga*, *Tamandua* also colonized (or evolved in) northern continental  
818 territories outside South America. This is supported from the occurrence of *Tamandua* sp.  
819 in the terminal Pleistocene of Central Mexico (Arroyo-Cabrales et al. 2004; Ferrusquía-  
820 Villafranca et al. 2010; Fig. 7). In its northern zone, the current distributional area of *T.*  
821 *mexicana* includes latitudes comparable with that of the referred fossil record for this  
822 species (Navarrete & Ortega 2011). Central Mexico is part of the transitional area between  
823 the current Neotropical and Nearctic regions, called Mexican Transition Zone (MTZ;  
824 Halffter & Morrone 2017). All these observations, in conjunction with the above  
825 interpretation of the Neogene biogeographical and environmental patterns, suggest that  
826 Myrmecophagidae kept throughout its evolutionary history a niche conservatism associated  
827 with tropical (warm) habitats (a case of phylogenetic niche conservatism or PNC; see  
828 Cooper et al. 2011; Fig. 8), possibly in parallel with the same pattern in species groups of  
829 its prey insects (Thompson 1994). Even more, the fact that Myrmecophagidae currently  
830 accumulates its highest species richness in the warmest and wettest belt of the Americas  
831 (Hayssen 2011; Navarrete & Ortega 2011; Miranda et al. 2017; Gaudin et al. 2018) is  
832 further interpreted as evidence that this higher taxon represents support for the tropical  
833 niche conservatism hypothesis (TCH; Wiens & Donoghue 2004; Wiens & Graham 2005).  
834 However, in line with the discussion above, this major ecological constraint in  
835 Myrmecophagidae is not only related to environmental thermal tolerance (see McNab  
836 [1985] for an analysis on the thermophysiological constraints of the Xenarthra; McNab  
837 [1984] also discussed the same issue for myrmecophagous mammals), as emphasized by

838 TCH, but it is also driven by food availability, at least by limiting or preventing historical  
839 colonization of low-productivity regions far from the tropics (Shaw & McDonald 1987;  
840 McDonald 2005; Šímová & Storch 2017; Fig. 8).

841

## 842 **Conclusion**

843 The systematic evidence presented here suggests that probably the diversification of  
844 Myrmecophagidae is taxonomically and biogeographically more complex than previously  
845 thought. This insight is based on the description of the new taxon Gen. et sp. nov. for the  
846 Middle Miocene of Colombia (co-occurrent species of *N. borealis*) and the determination  
847 of *Neotamandua*, as previously defined, as a wastebasket taxon which is probably formed  
848 by species belonging to more than one single genus. While Gen. et sp. nov. possibly has  
849 affinities with *Tamandua*, more information is needed to test its phylogenetic position  
850 within Myrmecophagidae. On the other hand, *N. borealis*, *N. greslebini* and *Neotamandua*  
851 sp. share postcranial features (potential synapomorphies) that imply some grade of kinship  
852 between them. Therefore, the two nominal species among the former ones are provisionally  
853 kept within *Neotamandua*. Alternatively, these features also may constitute  
854 symplesiomorphies of a hypothetical lineage which is apparently close to *Myrmecophaga*.  
855 The remaining nominal species referred to *Neotamandua*, i.e. '*N.*' *magna* and *N.?* *australis*  
856 were designated as *species inquirendae*. Overall, it is necessary to develop new systematic  
857 revisions, including new phylogenetic analyses similar to that of Gaudin & Branham  
858 (1998), from new material referable to Gen. et sp. nov. and the referred species to  
859 *Neotamandua*, so as to obtain enough evidence to solidly determine the phylogenetic  
860 position of the new species from La Venta and corroborate the putative monophyletic status

861 of *Neotamandua*. In line with the foregoing considerations, the paleontological exploration  
862 of Neogene sedimentary units in northern South America and northern Argentina is crucial  
863 to improve our understanding of the diversification of Myrmecophagidae.

864

## 865 **Acknowledgements**

866 A lot of people and institutions have contributed in distinct ways to the development of this  
867 research. We would like to specially thank Andrés Vanegas and his family; the group of  
868 defenders of the palaeontological heritage *Vigías del Patrimonio Paleontológico La*  
869 *Tatacoa*; Carlos Jaramillo (Smithsonian Tropical Research Institute); and all the staff of the  
870 Museo de Historia Natural La Tatacoa for assistance and providing access to the holotype  
871 of the new species described for La Venta. Alejandro Kramarz (MACN), Kenneth  
872 Angielczyk (FMNH), Bill Simpson (FMNH) and Patricia Holroyd (UCMP), Eduardo  
873 Flórez (ICN), Alfredo Carlini (CAC) and Itatí Olivares (MLP) gave permission to study  
874 extinct and extant anteater specimens in collections under their care. Sergio Vizcaíno and  
875 Susana Bargo (MLP - CONICET) provided photos of postcranial specimens labelled as  
876 *Neotamandua* sp in the MACN. Daniel Brinkman and Jamie Henderson (YPM) shared  
877 photos of a skull of *Protamandua rothi* (YPM-15267). Matthew Pound (Northumbria  
878 University) and Camila Hossotani (Universidade Federal de Mato Grosso do Sul, Brazil)  
879 kindly helped by facilitating their postgraduate theses. James Zachos (University of  
880 California, Santa Cruz) gave permission to reuse part of the data for his Cenozoic global  
881 temperature curve. Jorge Gonzalez was the palaeoartist who exquisitely recreated the new  
882 anteater from La Venta. K.J.L. received financial support from the following institutions:

883 CONICET (Internal Doctoral Fellowship); Field Museum (Science Visiting Scholarship);  
884 University of California Museum of Paleontology (Welles Fund).

885

## 886 **Statement of data archiving**

887 The nomenclatural acts contained in this work are registered in Zoobank:

888 [identifier Gen. et sp. nov.]

889 *LSID*. urn:lsid:zoobank.org:act:4EC0ABE1-C013-4113-9956-5DBD6E79FCEA

890 *LSID*. urn:lsid:zoobank.org:act:C4DC62D5-6470-4A04-B152-D42ED3BA332C

891

## 892 **References**

893 **Aceñolaza, F. & Sprechmann, P.** 2002. The Miocene marine transgression in the  
894 meridional Atlantic of South America. *Neues Jahrbuch für Geologie und Paläontologie-*  
895 *Abhandlungen*, **225**, 75–84. doi:10.1127/njgpa/225/2002/75

896 **Ameghino, F.** 1894. Enumération synoptique des espèces de mammifères fossiles des  
897 formations éocènes de Patagonie. *Boletín de la Academia Nacional de Ciencias en*  
898 *Córdoba*, **13**, 259–455.

899 **Ameghino, F.** 1904. Nuevas especies de mamíferos, cretáceos y terciarios de la República  
900 Argentina. *Anales de la Sociedad Científica Argentina*, **56–58**, 1–142.



- 901 **Ameghino, C.** 1919. Sobre mamíferos fósiles del piso araucanense de Catamarca y  
902 Tucumán. Primera Reunión Nacional de la Sociedad Argentina de Ciencias Naturales, 1,  
903 150–153.
- 904 **Amidon, W. H., Fisher, G. B., Burbank, D. W., Ciccioli, P. L., Alonso, R. N., Gorin, A.**  
905 **L. & Christoffersen, M. S.** 2017. Mio-Pliocene aridity in the southcentral Andes  
906 associated with Southern Hemisphere cold periods. *Proceedings of the National Academy*  
907 *of Sciences*, **114**(25), 6474–6479. doi:10.1073/pnas.1700327114.
- 908 **Andersson, C.** 2009. Neogene climates. Pp. 609–612 in V. Gornitz, (ed) *Encyclopedia of*  
909 *Paleoclimatology and Ancient Environments*. Dordrecht, Springer.
- 910 **Anderson, V. J., Horton, B. K., Saylor, J. E., Mora, A., Tesón, E., Breecker, D. O. &**  
911 **Ketcham, R. A.** 2016. Andean topographic growth and basement uplift in southern  
912 Colombia: Implications for the evolution of the Magdalena, Orinoco, and Amazon river  
913 systems. *Geosphere*, **12**(4), 1235–1256. doi:10.1130/GES01294.1
- 914 **Archibald, S. B., Johnson, K. R., Mathewes, R. W. & Greenwood, D. R.** 2011.  
915 Intercontinental dispersal of giant thermophilic ants across the Arctic during early Eocene  
916 hyperthermals. *Proceedings of the Royal Society B: Biological Sciences*, **278**(1725), 3679–  
917 3686. doi:10.1098/rspb.2011.0729
- 918 **Armella, M. A., García-López, D. A. & Domínguez, L.** 2018a. A new species of *Xotodon*  
919 (Notoungulata, Toxodontidae) from northwestern Argentina. *Journal of Vertebrate*  
920 *Paleontology*, **38**(1), e1425882. doi:10.1080/02724634.2017.1425882
- 921 **Armella, M. A., Nasif, N. L. & Cerdeño, E.** 2018b. Small-sized mesotheriines  
922 (Mesotheriidae, Notoungulata) from Northwestern Argentina: Systematic, chronological,

- 923 and paleobiogeographic implications. *Journal of South American Earth Sciences*, **83**, 14–  
924 26. doi:10.1016/j.jsames.2018.02.002
- 925 **Arroyo-Cabrales, J., Polaco, O. J. & Johnson, E.** 2004. Quaternary mammals from  
926 Mexico. Pp. 69–70 in L. C. Maul & R. D. Kahlke (eds) *Late Neogene and Quaternary*  
927 *Biodiversity and Evolution: Regional developments and interregional correlations* (Vol. 2).  
928 Weimar (Germany).
- 929 **Badgley, C., Barry, J. C., Morgan, M. E., Nelson, S. V., Behrensmeyer, A. K., Cerling,**  
930 **T. E. & Pilbeam, D.** 2008. Ecological changes in Miocene mammalian record show impact  
931 of prolonged climatic forcing. *Proceedings of the National Academy of Sciences*, **105**(34),  
932 12145–12149. doi: 10.1073/pnas.0805592105
- 933 **Bargo, M. S., Toledo, N. & Vizcaíno, S. F.** 2012. Paleobiology of the Santacrucian sloths  
934 and anteaters (Xenarthra, Pilosa). Pp. 216–242 in S. F. Vizcaíno, R. F. Kay & M. S. Bargo,  
935 (eds) *Early Miocene paleobiology in Patagonia: High-latitude paleocommunities of the*  
936 *Santa Cruz formation*. Cambridge University Press, New York.
- 937 **Barros, M. C., Sampaio, I. & Schneider, H.** 2008. Novel 12S mtDNA findings in sloths  
938 (Pilosa, Folivora) and anteaters (Pilosa, Vermilingua) suggest a true case of long branch  
939 attraction. *Genetic and Molecular Biology*, **31**(3), 793–799.  
940 doi:10.1016/j.jsames.2018.02.002
- 941 **Blois, J. L. & Hadly, E. A.** 2009. Mammalian response to Cenozoic climatic change.  
942 *Annual Review of Earth and Planetary Sciences*, **37**, 181–208.  
943 doi:10.1146/annurev.earth.031208.100055

- 944 **Boisserie, J. R. & Merceron, G.** 2011. Correlating the success of Hippopotaminae with  
945 the C4 grass expansion in Africa: relationship and diet of early Pliocene hippopotamids  
946 from Langebaanweg, South Africa. *Palaeogeography, Palaeoclimatology, Palaeoecology*,  
947 **308**(3–4), 350–361. doi:10.1016/j.palaeo.2011.05.040
- 948 **Bonini, R. A.** 2014. *Bioestratigrafía y diversidad de los mamíferos del Neógeno de San*  
949 *Fernando y Puerta de Corral Quemado (Catamarca, Argentina)*. PhD thesis, Universidad  
950 Nacional de La Plata, Argentina, 366 pp. doi:10.35537/10915/34382
- 951 **Boscaini A., Pujos F. & Gaudin T.** 2019. A reappraisal of the phylogeny of Mylodontidae  
952 (Mammalia, Xenarthra) and the divergence of mylodontine and lestodontine sloths.  
953 *Zoologica Scripta*. doi:10.1111/zsc.12376
- 954 **Bouchenak □ Khelladi, Y., Anthony Verboom, G., Hodkinson, T. R., Salamin, N.,**  
955 **Francois, O., Ni Chonghaile, G. & Savolainen, V.** 2009. The origins and diversification  
956 of C4 grasses and savanna □ adapted ungulates. *Global Change Biology*, **15**(10), 2397–  
957 2417. doi:10.1111/j.1365-2486.2009.01860.x
- 958 **Bourguignon, T., Lo, N., Šobotník, J., Ho, S.Y., Iqbal, N., Coissac, E., Lee, M.,**  
959 **Jendryka, M.M., Sillam–Dussès, D., Krížková, B., Roisin, Y. & Evans, T.A.** 2017.  
960 Mitochondrial phylogenomics resolves the global spread of higher termites, ecosystem  
961 engineers of the tropics. *Molecular Biology and Evolution*, **34**(3), 589–597.  
962 doi:10.1016/j.ympev.2017.09.025
- 963 **Brandoni, D., Schmidt, G. I., Candela, A. M., Noriega, J. I., Brunetto, E. & Fiorelli, L.**  
964 **E.** 2012. Mammals from the Salicas Formation (late Miocene), La Rioja Province,

- 965 northwestern Argentina: Paleobiogeography, age and paleoenvironment. *Ameghiniana*,  
966 **49**(3), 375–388. doi:10.5710/AMGH.v49i3(467)
- 967 **Brea, M., Zucol, A.F., Bargo, M.S., Fernicola, J.C. & Vizcaíno, S.F.** 2017. First  
968 Miocene record of Akaniaceae in Patagonia (Argentina): a fossil wood from the early  
969 Miocene Santa Cruz Formation and its palaeobiogeographical implications. *Botanical of*  
970 *the Journal Linnean Society*, **183**, 334–347. doi:10.1093/botlinnean/bow014
- 971 **Carlini, A. A., Castro, M. C., Madden, R. H. & Scillato-Yané, G. J.** 2014. A new  
972 species of Dasypodidae (Xenarthra: Cingulata) from the late Miocene of northwestern  
973 South America: Implications in the Dasypodini phylogeny and diversity. *Historical*  
974 *Biology*, **26**(6), 728–736. doi:10.1080/08912963.2013.840832
- 975 **Carrillo, J. D., Forasiepi, A., Jaramillo, C. & Sánchez-Villagra, M. R.** 2015.  
976 Neotropical mammal diversity and the Great American Biotic Interchange: Spatial and  
977 temporal variation in South America's fossil record. *Frontiers in Genetics*, **5**, 451.  
978 <http://doi.org/10.3389/fgene.2014.00451>.
- 979 **Chan, W. L., Abe-Ouchi, A. & Ohgaito, R.** 2011. Simulating the mid-Pliocene climate  
980 with the MIROC general circulation model: experimental design and initial results.  
981 *Geoscientific Model Development*, **4**(4), 1035–1049.
- 982 **Coates, A. G. & Stallard, R. F.** 2013. How old is the Isthmus of Panama? *Bulletin of*  
983 *Marine Science*, **89**(4), 801–813. doi:10.5343/bms.2012.1076
- 984 **Cooper, N., Freckleton, R. P. & Jetz, W.** 2011. Phylogenetic conservatism of  
985 environmental niches in mammals. *Proceedings of the Royal Society B: Biological*  
986 *Sciences*, **278**(1716), 2384–2391. doi:10.1098/rspb.2010.2207

- 987 **Cope, E. D.** 1889. The Edentata of North America. *The American Naturalist*, **23**, 657–664.
- 988 **Cotton, J. M., Hyland, E. G. & Sheldon, N. D.** 2014. Multiproxy evidence for tectonic  
989 control on the expansion of C4 grasses in northwest Argentina. *Earth and Planetary*  
990 *Science Letters*, **395**, 41–50. doi:10.1016/j.epsl.2014.03.014
- 991 **Cozzuol, M. A.** 2006. The Acre vertebrate fauna: age, diversity, and geography. *Journal of*  
992 *South American Earth Sciences*, **21**(3), 185–203. doi:10.1016/j.jsames.2006.03.005
- 993 **Croft, D. A., Flynn, J. J. & Wyss, A. R.** 2007. A new basal glyptodontid and other  
994 Xenarthra of the early Miocene Chucal Fauna, northern Chile. *Journal of Vertebrate*  
995 *Paleontology*, **27**(4), 781–797. doi:10.1671/0272-4634(2007)27[781:ANBGAO]2.0.CO;2
- 996 **Croxen III, F. W., Shaw, C. A. & Sussman, D. R.** 2007. Pleistocene geology and  
997 paleontology of the Colorado River Delta at Golfo de Santa Clara, Sonora, Mexico. Pp. 84–  
998 89 in: R. E. Reynolds (ed.), *Wild, Scenic and Rapid: A Trip Down the Colorado River*  
999 *Trough*. The 2007 Desert Symposium, Field Guide and Abstracts from Proceedings.  
1000 California State University, Desert Studies Consortium, Fullerton.
- 1001 **Davidson, D. W. & Patrell-Kim, L.** 1996. Tropical arboreal ants: Why so abundant? Pp.  
1002 127–140 in A. C. Gibson (ed) *Neotropical biodiversity and conservation*. UCLA Botanical  
1003 Garden, Los Angeles, CA.
- 1004 **Davidson, D. W., Cook, S. C., Snelling, R. R. & Chua, T. H.** 2003. Explaining the  
1005 abundance of ants in lowland tropical rainforest canopies. *Science*, **300**(5621), 969–972.  
1006 doi:10.1126/science.1082074

- 1007 **de Vivo, M. & Carmignotto, A. P.** 2004. Holocene vegetation change and the mammal  
1008 faunas of South America and Africa. *Journal of Biogeography*, **31**(6), 943–957.  
1009 doi:10.1111/j.1365-2699.2004.01068.x
- 1010 **Delsuc, F., Ctzeflis, F. M., Stanhope, M. J. & Douzery, E. J.** 2001. The evolution of  
1011 armadillos, anteaters and sloths depicted by nuclear and mitochondrial phylogenies:  
1012 Implications for the status of the enigmatic fossil *Eurotamandua*. *Proceedings of the Royal*  
1013 *Society of London. Series B: Biological Sciences*, **268**(1476), 1605–1615.  
1014 doi:10.1098/rspb.2001.1702
- 1015 **Delsuc, F., Superina, M., Tilak, M. K., Douzery E. J. P. & Hassanin, A.** 2012 Molecular  
1016 phylogenetics unveils the ancient evolutionary origins of the enigmatic fairy armadillos.  
1017 *Molecular Phylogenetics and Evolution*, **62**, 673–680. doi:10.1016/j.ympev.2011.11.008
- 1018 **Dowsett, H., Dolan, A., Rowley, D., Moucha, R., Forte, A. M., Mitrovica, J. X., Pound,**  
1019 **M., Salzmann, U., Robinson, M., Chandler, M. & Foley, K.** 2016. The PRISM4 (mid–  
1020 Piacenzian) palaeoenvironmental reconstruction. *Climate of the Past Discussions*, **12**,  
1021 1519–1538. doi:10.5194/cp-2016-33
- 1022 **Eggleton, P., Bignell, D. E., Sands, W. A., Mawdsley, N. A., Lawton, J. H., Wood, T.**  
1023 **G. & Bignell, N. C.** 1996. The diversity, abundance and biomass of termites under  
1024 differing levels of disturbance in the Mbalmayo Forest Reserve, southern Cameroon.  
1025 *Philosophical Transactions of the Royal Society of London. Series B: Biological Sciences*,  
1026 **351**(1335), 51–68. doi:10.1098/rstb.1996.0004
- 1027 **Ellwood, M. D. F. & Foster, W. A.** 2004. Doubling the estimate of invertebrate biomass in  
1028 a rainforest canopy. *Nature*, **429**, 549–551. doi:10.1038/nature02560.

- 1029 **Engelmann, G. F.** 1978. *The Logic of Phylogenetic Analysis and the Phylogeny of the*  
1030 *Xenarthra*. Unpublished Ph.D. thesis dissertation, Columbia University, New York, 329 pp.
- 1031 **Engelmann, G. F.** 1985. The phylogeny of the Xenarthra. Pp. 51–64 in G. G. Montgomery  
1032 (ed) *The Evolution and Ecology of Armadillos, Sloths, and Vermilinguas*. Smithsonian  
1033 Institution Press, Washington, DC.
- 1034 **Esteban, G. I., Nasif, N., & Georgieff, S. M.** 2014. Cronobioestratigrafía del Mioceno  
1035 tardío-Plioceno temprano, Puerta de Corral Quemado y Villavil, Provincia de Catamarca,  
1036 Argentina. *Acta Geológica Lilloana*, **26**, 165–192. doi:10.1206/0003-0090-404.1.1
- 1037 **Feijoo, M. & Parada, A.** 2017. Macrosystematics of eutherian mammals combining HTS  
1038 data to expand taxon coverage. *Molecular phylogenetics and evolution*, **113**, 76–83.  
1039 doi:10.1016/j.ympev.2017.05.004
- 1040 **Ferrusquía-Villafranca, I., Arroyo-Cabrales, J., Martínez-Hernández, E., Gama-**  
1041 **Castro, J., Ruiz-González, J., Polaco, O. J. & Johnson, E.** 2010. Pleistocene mammals of  
1042 Mexico: A critical review of regional chronofaunas, climate change response and  
1043 biogeographic provinciality. *Quaternary International*, **217**(1–2), 53–104.  
1044 doi:10.1016/j.quaint.2009.11.036
- 1045 **Ferrusquía-Villafranca, I., Arroyo-Cabrales, J., Johnson, E., Ruiz-González, J.,**  
1046 **Martínez-Hernández, E., Gama-Castro, J., de Anda-Hurtado, P. & Polaco, O. J.** 2017.  
1047 Quaternary mammals, people, and climate change: A view from southern North America.  
1048 Pp. 27–67 in G. Monks (ed.) *Climate change and human responses*. Springer, Dordrecht.  
1049 doi:10.1007/978-94-024-1106-5

- 1050 **Flynn, J. J., Guerrero, J. & Swisher III, C. C.** 1997. Geochronology of the Honda  
1051 Group. Pp. 44–60 in R. F. Kay, R. H. Madden, R. L. Cifelli & J. J. Flynn (eds) *Vertebrate*  
1052 *Paleontology in the Neotropics: The Miocene Fauna of La Venta, Colombia*. Smithsonian  
1053 Institution Press, Washington.
- 1054 **Flower, W. H.** 1883. On the arrangement of the Orders and Families of existing  
1055 Mammalia. *Proceedings of the Zoological Society of London*, **1883**, 178–186.
- 1056 **Foley, N. M., Springer, M. S. & Teeling, E. C.** 2016. Mammal madness: Is the mammal  
1057 tree of life not yet resolved? *Philosophical Transactions of the Royal Society B: Biological*  
1058 *Sciences*, **371**(1699), 20150140. doi:10.1098/rstb.2015.0140
- 1059 **Forrest, M., Eronen, J. T., Utescher, T., Knorr, G., Stepanek, C., Lohmann, G. &**  
1060 **Hickler, T.** 2015. Climate-vegetation modelling and fossil plant data suggest low  
1061 atmospheric CO<sub>2</sub> in the late Miocene. *Climate of the Past*, **11**, 1701–1732. doi:10.5194/cp-  
1062 11-1701-2015
- 1063 **Fortelius, M., Eronen, J. T., Kaya, F., Tang, H., Raia, P. & Puolamäki, K.** 2014.  
1064 Evolution of Neogene mammals in Eurasia: Environmental forcing and biotic interactions.  
1065 *Annual Review of Earth and Planetary Sciences*, **42**, 579–604. doi:10.1146/annurev-earth-  
1066 050212-124030
- 1067 **Frigola, A., Prange, M. & Schulz, M.** 2018. Boundary conditions for the Middle Miocene  
1068 Climate Transition (MMCT v1. 0). *Geoscientific Model Development*, **11**(4), 1607–1626.  
1069 doi:10.5194/gmd-11-1607-2018



- 1070 **Fuster, A., Diodato, L. & Contreras, J. H.** 2018. Dieta de *Myrmecophaga tridactyla*  
1071 (Pilosa: Myrmecophagidae) en pastizales y bosques del noreste de Santiago del Estero y su  
1072 relación con las hormigas. *Acta zoológica lilloana*, **62**(1), 1–9.
- 1073 **Gallo, J. A., Abba, A. M., Elizalde, L., Di Nucci, D., Ríos, T. A. & Ezquiaga, M. C.**  
1074 2017. First study on food habits of anteaters, *Myrmecophaga tridactyla* and *Tamandua*  
1075 *tetradactyla* at the southern limit of their distribution. *Mammalia*, **81**(6), 601–604. doi:  
1076 10.1515/mammalia-2016-0117
- 1077 **Gambaryan, P. P., Zherebtsova, O. V., Perepelova, A. A. & Platonov, V. V.** 2009. Pes  
1078 muscles and their action in giant anteater *Myrmecophaga tridactyla* (Myrmecophagidae,  
1079 Pilosa) compared with other plantigrade mammals. *Russian Journal of Theriology*, **8**(1), 1–  
1080 15. doi:10.15298/rusjtheriol.8.1.01
- 1081 **Gaudin, T. J. & Branham, D. G.** 1998. The phylogeny of the Myrmecophagidae  
1082 (Mammalia, Xenarthra, Vermilingua) and the relationship of *Eurotamandua* to the  
1083 Vermilingua. *Journal of Mammalian Evolution*, **5**, 237–265.  
1084 doi:10.1023/A:1020512529767
- 1085 **Gaudin, T. J. & McDonald, H. G.** 2008. Morphology-based investigations of the  
1086 phylogenetic relationships among extant and fossil xenarthrans. Pp. 24–36 in S. F. Vizcaíno  
1087 & W. J. Loughry. (eds) *The biology of the Xenarthra*. University of Florida Press,  
1088 Gainesville.
- 1089 **Gaudin, T. J., Hicks, P. & Di Blanco, Y.** 2018. *Myrmecophaga tridactyla* (Pilosa:  
1090 Myrmecophagidae). *Mammalian Species*, **50**(956), 1–13. doi: 10.1093/mspecies/sey001

- 1091 **Ge, D., Wen, Z., Xia, L., Zhang, Z., Erbajeva, M., Huang, C. & Yang, Q.** 2013.  
1092 Evolutionary history of lagomorphs in response to global environmental change. *PLoS One*,  
1093 8(4), e59668. doi:10.1371/journal.pone.0059668
- 1094 **Gibb, G. C., Condamine, F. L., Kuch, M., Enk, J., Moraes-Barros, N., Superina, M.,**  
1095 **Poinar, H. N. & Delsuc, F.** 2015. Shotgun mitogenomics provides a reference  
1096 phylogenetic framework and timescale for living xenarthrans. *Molecular Biology and*  
1097 *Evolution*, **33**(3), 621–642. doi:10.1093/molbev/msv250
- 1098 **Gray, J. E.** 1825. An outline of an attempt at the disposition of Mammalia into tribes and  
1099 families, with a list of genera apparently pertaining to each tribe. *Annals of Philosophy*, **10**,  
1100 337–344.
- 1101 **Grimmer, F., Dupont, L., Lamy, F., Jung, G., González, C. & Wefer, G.** 2018. Early  
1102 Pliocene vegetation and hydrology changes in western equatorial South America. *Climate*  
1103 *of the Past*, **14**(11), 1739–1754. doi:10.5194/cp-14-1739-2018
- 1104 **Guénard, B., Perrichot, V. & Economo, E. P.** 2015. Integration of global fossil and  
1105 modern biodiversity data reveals dynamism and stasis in ant macroecological patterns.  
1106 *Journal of Biogeography*, **42**(12), 2302–2312. doi:10.1111/jbi.12614
- 1107 **Guerrero, J.** 1997. Stratigraphy, sedimentary environments, and the Miocene uplift of the  
1108 Colombian Andes. Pp. 15–43 in R. F. Kay, R. H. Madden, R. L. Cifelli & J. J. Flynn (eds)  
1109 *Vertebrate Paleontology in the Neotropics: The Miocene Fauna of La Venta, Colombia*.  
1110 Smithsonian Institution Press, Washington, DC.

- 1111 **Halffter, G. & Morrone, J. J.** 2017. An analytical review of Halffter's Mexican transition  
1112 Zone, and its relevance for evolutionary biogeography, ecology and biogeographical  
1113 regionalization. *Zootaxa*, **4226**(1), 1–46. doi:10.1007/s13127-013-0148-0
- 1114 **Halliday, T. J. D., Upchurch, P. & Goswami, A.** 2016. Eutherians experienced elevated  
1115 evolutionary rates in the immediate aftermath of the Cretaceous-Palaeogene mass  
1116 extinction. *Proceedings of the Royal Society B: Biological Sciences*, **283**(1833), 20153026.  
1117 doi:10.1098/rspb.2015.3026
- 1118 **Hayssen, V.** 2011. *Tamandua tetradactyla* (Pilosa: Myrmecophagidae). *Mammalian*  
1119 *Species*, 43(875), 64–74. doi:10.1644/875.1
- 1120 **Hayssen, V., Miranda, F. & Pasch, B.** 2012. *Cyclopes didactylus* (Pilosa: Cyclopedidae).  
1121 *Mammalian Species*, 44(895), 51–58. doi: 10.1644/895.1
- 1122 **Henrot, A. J., Utescher, T., Erdei, B., Dury, M., Hamon, N., Ramstein, G., Krapp, M.,**  
1123 **Herold, N., Goldner, A., Favre, E. & Munhoven, G.** 2017. Middle Miocene climate and  
1124 vegetation models and their validation with proxy data. *Palaeogeography,*  
1125 *Palaeoclimatology, Palaeoecology*, **467**, 95–119. doi:10.1016/j.palaeo.2016.05.026
- 1126 **Herold, N., Huber, M., Greenwood, D. R., Müller, R. D. & Seton, M.** 2011. Early to  
1127 middle Miocene monsoon climate in Australia. *Geology*, **39**(1), 3–6. doi:10.1130/G31208.1
- 1128 **Hirschfeld, S. E.** 1976. A new fossil anteater (Edentata, Mammalia) from Colombia, SA  
1129 and evolution of the Vermilingua. *Journal of Paleontology*, **50**, 419–432.
- 1130 **Hölldobler, B. & Wilson EO.** 1990. *The Ants*. Cambridge, MA: Harvard University Press.  
1131 732 pp.

- 1132 **Hossotani C. M. S., Ragusa-Netto J. & Luna HS.** 2017. Skull morphometry and vault  
1133 sutures of *Myrmecophaga tridactyla* and *Tamandua tetradactyla*. *Iheringia, Série Zoologia*,  
1134 **107**, e2017038. doi:10.1590/1678-4766e2017038.
- 1135 **Huntley, B. & Webb III, T.** 1988. *Vegetation History* (Vol. 7). Springer Science &  
1136 Business Media. Kluwer, Dordrecht, 803 pp.
- 1137 **Huxley, J. S.** 1958. Evolutionary processes and taxonomy with special reference to grades.  
1138 *Uppsala Universitets Arsskrift*, 6, 21–39.
- 1139 **Iglesias A., Artabe, A. E. & Morel, E. M.** 2011. The evolution of Patagonian climate and  
1140 vegetation from the Mesozoic to the present. *Biological Journal of the Linnean Society*,  
1141 **103**, 409–422. doi: 10.1111/j.1095-8312.2011.01657.x
- 1142 **Illiger, J. K. W.** 1811. *Prodromus systematis mammalium et avium additis terminis*  
1143 *zoographicis triusque classis, eorumque versione germanica*. Berlin, 301 pp.
- 1144 **Jaramillo, C.** 2018. Evolution of the Isthmus of Panama: Biological, paleoceanographic,  
1145 and paleoclimatological implications. Pp. 323–338 in C. Hoorn & A. Antonelli (eds)  
1146 *Mountains, climate and biodiversity*. John Wiley & Sons, Oxford.
- 1147 **Jiménez, N. L., Di Blanco, Y. E. & Calcaterra, L. A.** 2018. Ant diversity in the diet of  
1148 giant anteaters, *Myrmecophaga tridactyla* (Pilosa: Myrmecophagidae), in the Iberá Nature  
1149 Reserve, Argentina. *Mastozoologia Neotropical*, **25**(2) 1–14.  
1150 doi:10.31687/saremMN.18.25.2.0.16
- 1151 **Kay, R. F. & Madden, R. H.** 1997. Mammals and rainfall: Paleoecology of the Middle  
1152 Miocene at La Venta (Colombia, South America). *Journal of Human Evolution*, **32**(2–3),  
1153 161–199. doi: 10.1006/jhev.1996.0104

- 1154 **Kay R. F., Vizcaíno S. F. & Bargo M, S.** 2012. A review of the paleoenvironment and  
1155 paleoecology of the Miocene Santa Cruz Formation. Pp. 331–365 in S. F. Vizcaíno, R. F.  
1156 Kay & M. S. Bargo (eds) *Early Miocene Paleobiology in Patagonia: High-Latitude*  
1157 *Paleocommunities of the Santa Cruz Formation*. Cambridge University Press, New York.
- 1158 **Keller, L. & E. Gordon.** 2009. *The Lives of Ants*. Oxford University Press, New York, 273  
1159 pp.
- 1160 **Kraglievich, L.** 1934. *La antigüedad pliocena de las faunas de Monte Hermoso y*  
1161 *Chapadmalal, deducidas de su comparación con las que le precedieron y sucedieron*.  
1162 Imprenta El Siglo Ilustrado, Montevideo, 136 pp.
- 1163 **Kraglievich, L.** 1940. Dos nuevas especies fósiles de oso hormigueros. Pp. 631–636 in A.  
1164 J. Torcelli and C. A. Marelli (eds) *Obras de geología y paleontología* (Vol. 3). Ministerio  
1165 de Obras Públicas de la Provincia de Buenos Aires, La Plata.
- 1166 **LaPolla, J. S., Dlussky, G. M. & Perrichot, V.** 2013. Ants and the fossil record. *Annual*  
1167 *review of entomology*, **58**, 609–630. doi:10.1111/syen.12090
- 1168 **Latorre, C., Quade, J. & McIntosh, W. C.** 1997. The expansion of C4 grasses and global  
1169 change in the late Miocene: Stable isotope evidence from the Americas. *Earth and*  
1170 *Planetary Science Letters*, **146**(1–2), 83–96. doi:10.1016/S0012-821X(96)00231-2
- 1171 **Lohmann, G., Butzin, M. & Bickert, T.** 2015. Effect of vegetation on the Late Miocene  
1172 ocean circulation. *Journal of Marine Science and Engineering*, **3**(4), 1311–1333.  
1173 doi:10.3390/jmse3041311

- 1174 **Lubin, Y. D. & Montgomery, G. G.** 1981. Defenses of *Nasutitermes* termites (Isoptera,  
1175 Termitidae) against *Tamandua* anteaters (Edentata, Myrmecophagidae). *Biotropica*, **13**, 66–  
1176 76. doi: 10.2307/2387872
- 1177 **MacFadden, B. J.** 2000. Cenozoic mammalian herbivores from the Americas:  
1178 Reconstructing ancient diets and terrestrial communities. *Annual Review of Ecology and*  
1179 *Systematics*, **31**(1), 33–59. doi:10.1146/annurev.ecolsys.31.1.33
- 1180 **McDonald, H. G.** 2005. Paleoecology of extinct xenarthrans and the Great American  
1181 Biotic Interchange. *Bulletin of the Florida State Museum of Natural History*, **45**, 313–333.
- 1182 **McDonald, H. G. & De Iuliis, G.** 2008. Fossil history of sloths. Pp. 39–55 in S. F.  
1183 Vizcaíno & W. J. Loughry (eds) *The biology of the Xenarthra*. University Press of Florida,  
1184 Gainesville.
- 1185 **McDonald, H. G., Vizcaíno, S. F., & Bargo, M. S.** 2008. Skeletal anatomy and the fossil  
1186 history of the Vermilingua. Pp. 257–268 in S. F. Vizcaíno & W. J. Loughry (eds) *The*  
1187 *biology of the Xenarthra*. University Press of Florida, Gainesville.
- 1188 **McKenna, M. C. & Bell S. K.** 1997. *Classification of mammals above the species level*  
1189 (Vol. XIII). Columbia University Press, New York, 631 pp.
- 1190 **McNab, B. K.** 1984. Physiological convergence amongst ant-eating and termite-eating  
1191 mammals. *Journal of Zoology*, **203**(4), 485–510. doi:10.1111/j.1469-7998.1984.tb02345.x
- 1192 **McNab, B. K.** 1985. Energetics, population biology, and distribution of xenarthrans, living  
1193 and extinct. Pp. 219–232 in G. G. Montgomery (ed.) *The evolution and ecology of*  
1194 *armadillos, sloths, and vermilinguas*. Smithsonian Institution Press, Washington, DC.

- 1195 **Medri, I. M., Mourao, G. D. M. & Harada, A. Y.** 2003. Dieta de tamanduá-bandeira  
1196 (*Myrmecophaga tridactyla*) no Pantanal da Nhecolândia, Brasil. *Edentata*, **5**, 29–34.
- 1197 **Miranda, F., Veloso, R., Superina, M. & Zara, F. J.** 2009. Food habits of wild silky  
1198 anteaters (*Cyclopes didactylus*) of São Luis do Maranhão, Brazil. *Edentata*, **2009**(10), 1–6.  
1199 doi:10.1896/020.010.0109
- 1200 **Miranda, F. R., Casali, D. M., Perini, F. A., Machado, F. A. & Santos, F. R.** 2017.  
1201 Taxonomic review of the genus *Cyclopes* Gray, 1821 (Xenarthra: Pilosa), with the  
1202 revalidation and description of new species. *Zoological Journal of the Linnean Society*,  
1203 **183**(3), 687–721. doi:10.1093/zoolinnean/zlx079
- 1204 **Montgomery, G.G.** 1985a. Impact of vermilinguas (*Cyclopes, Tamandua*: Xenarthra =  
1205 Edentata) on arboreal ant populations. Pp. 351–363 in G.G. Montgomery (ed) *Ecology and*  
1206 *evolution of sloths, anteaters and armadillos* (Mammalia, Xenarthra = Edentata).  
1207 Smithsonian Institution Press, Washington, D.C.
- 1208 **Montgomery, G. G.** 1985b. Movements, foraging and food habits of the four extant  
1209 species of neotropical vermilinguas (Mammalia; Myrmecophagidae). Pp. 365–367 in G.G.  
1210 Montgomery (ed) *The Evolution and Ecology of Armadillos, Sloth, and Vermilinguas*.  
1211 Smithsonian Institution Press, Washington, D.C.
- 1212 **Morales-Sandoval, V. H.** 2010. Caracterización nutricional de la dieta de Tamandua  
1213 mexicana en el Zoológico “Miguel Álvarez del Toro” (ZooMAT) Chiapas, México.  
1214 *Edentata*, **11**(1), 44–49. doi:10.1896/020.011.0108

- 1215 **Morley, R. J.** 2011. Cretaceous and Tertiary climate change and the past distribution of  
1216 megathermal rainforests. Pp. 1–34 in M. B. Bush & J. R. Flenley (eds) *Tropical rainforest*  
1217 *responses to climatic change*. Springer, Berlin, Heidelberg.
- 1218 **Moscato, D. A. & Jasinski, S. E.** 2016. First record of fossil chelydrid and trionyhid  
1219 turtles (testudines) from the Pleistocene of Sonora, Mexico. Pp. 163–168 in R. M. Sullivan  
1220 & G. L. Spencer (eds) *Fossil Record 5: Bulletin*. New Mexico Museum of Natural History  
1221 & Science, Albuquerque.
- 1222 **Naples, V. L.** 1999. Morphology, evolution and function of feeding in the giant anteater  
1223 (*Myrmecophaga tridactyla*). *Journal of Zoology*, **249**(1), 19–41. doi:10.1111/j.1469–  
1224 7998.1999.tb01057.x
- 1225 **Navarrete, D. & Ortega, J.** 2011. *Tamandua mexicana* (Pilosa: Myrmecophagidae).  
1226 *Mammalian Species*, **43**(874), 56–63. doi:10.1644/874.1
- 1227 **Norman, J. E. & Ashley, M. V.** 1994. Molecular systematics of the xenarthrans. American  
1228 Society of Mammalogists, 75th Anniversary Meeting, Abstract 271A, Washington, DC.
- 1229 **Oliva, C., Zurita, A. E., Dondas, A. & Scillato-Yané, G. J.** 2010. Los Glyptodontinae  
1230 (Xenarthra, Glyptodontidae) del Piso/Edad Chapadmalalense (Plioceno tardío): Revisión y  
1231 aportes a su conocimiento. *Revista mexicana de ciencias geológicas*, **27**(1), 112–120.
- 1232 **O’Dea, A., Lessios, H. A., Coates, A. G., Eytan, R. I., Restrepo-Moreno, S. A., Cione,**  
1233 **A. L., Collins, S. L., Queiroz, A., Farris, D. W., Norris, R. D., Stallard, R. F.,**  
1234 **Woodburne, M. O., Aguilera, O., Aubry, M. P., Berggren, W. A., Budd, A. F.,**  
1235 **Cozzuol, M. A., Coppard, S. E., Duque-Caro, H., Finnegan, S., Gasparini, G. M.,**  
1236 **Grossman, E. L., Johnson, K. G., Keigwin, L. D., Knowlton, N., Leigh, E. G., Pingel, J.**



- 1237 **S., Marko, P. B., Pyenson, B. M., Rachello-Dolmen, P. G., Soibelzon, E., Soilbezon, L.,**  
1238 **Todd, J. A. Vermeij, G. J. & Stallard, R. F.** 2016. Formation of the Isthmus of Panama.  
1239 *Science advances*, **2**(8), e1600883. doi:10.1126/sciadv.1600883
- 1240 **Ortiz-Jaureguizar, E. & Cladera, G. A.** 2006. Paleoenvironmental evolution of southern  
1241 South America during the Cenozoic. *Journal of Arid Environments*, **66**(3), 498–532.  
1242 doi:10.1016/j.jaridenv.2006.01.007
- 1243 **Palazzesi, L., Barreda, V. D., Cuitiño, J. I., Guler, M. V., Tellería, M. C. & Santos, R.**  
1244 **V.** 2014. Fossil pollen records indicate that Patagonian desertification was not solely a  
1245 consequence of Andean uplift. *Nature Communications*, **5**, 3558. doi:10.1038/ncomms4558
- 1246 **Pascual, R. & Ortiz-Jaureguizar, E.** 1990. Evolving climates and mammal faunas in  
1247 Cenozoic South America. *Journal of Human Evolution*, **19**, 23–60. doi:10.1016/B978-0-12-  
1248 260345-7.50006-0
- 1249 **Patterson, B., Segall, W., Turnbull, W. D. & Gaudin, T. J.** 1992. The ear region in  
1250 xenarthrans (=Edentata: Mammalia). Part II. Pilosa (sloths and anteaters), palaeonodons,  
1251 and a miscellany. *Fieldiana Geology, n.s.* **24**, 1–79.
- 1252 **Plotnick, R. E. & Wagner, P. J.** 2006. Round up the usual suspects: Common genera in  
1253 the fossil record and the nature of wastebasket taxa. *Paleobiology*, **32**(1), 126–146.  
1254 doi:10.1666/0094-8373(2006)032[0126:RUTUSC]2.0.CO;2
- 1255 **Pound, M. J.** 2012. *Middle to Late Miocene terrestrial biota and climate*. Unpublished  
1256 Ph.D. thesis, University of Leeds, Leeds, 416 pp.

- 1257 **Pound, M. J., Haywood, A. M., Salzmann, U. & Riding, J. B.** 2012. Global vegetation  
1258 dynamics and latitudinal temperature gradients during the Mid to Late Miocene (15.97–  
1259 5.33 Ma). *Earth-Science Reviews*, **112**(1–2), 1–22. doi:10.1016/j.earscirev.2012.02.005
- 1260 **Quattrocchio M. E., Volkheimer, W., Borromei, A. M. & Martínez, M. A.** 2011.  
1261 Changes of the palynobiotas in the Mesozoic and Cenozoic of Patagonia: A review.  
1262 *Biological Journal of the Linnean Society*, **103**, 380–396. doi: 10.1111/j.1095-  
1263 8312.2011.01652.x
- 1264 **Raigemborn, M. S., Krapovickas, V., Beilinson, E., Peral, L. E. G., Zucol, A. F.,**  
1265 **Zapata, L. & Sial, A. N.** 2018. Multiproxy studies of Early Miocene pedogenic calcretes in  
1266 the Santa Cruz Formation of southern Patagonia, Argentina indicate the existence of a  
1267 temperate warm vegetation adapted to a fluctuating water table. *Palaeogeography,*  
1268 *Palaeoclimatology, Palaeoecology*, 500:1–23. doi:10.1016/j.palaeo.2018.03.037
- 1269 **Redford, K. H.** 1985. Feeding and food preference in captive and wild giant anteaters  
1270 (*Myrmecophaga tridactyla*). *Journal of Zoology*, **205**(4), 559–572. doi:10.1111/j.1469–  
1271 7998.1985.tb03544.x
- 1272 **Redford, K. H.** 1987. Ants and termites as food: Patterns of mammalian myrmecophagy.  
1273 Pp. 349–399 in H. H. Genoways (ed.) *Current mammalogy*. Plenum Press, New York.
- 1274 **Reiss, K. Z.** 2001. Using phylogenies to study convergence: the case of the anteating  
1275 mammals. *American Zoologist*, **41**(3), 507–525. doi:10.1093/icb/41.3.507
- 1276 **Ride, W. D. L., Cogger, H. G., Dupuis, C., Kraus, O., Minelli, A., Thompson, F. C. &**  
1277 **Tubbs, P. K.** 1999. *International Code of Zoological Nomenclature*. 4th ed. International  
1278 Trust for Zoological Nomenclature and the Natural History Museum, London, 106 pp.

- 1279 **Riggs, E. S.** 1928. Work accomplished by the Field Museum Paleontological Expeditions  
1280 to South America. *Science*, **67**(1745), 585–587.
- 1281 **Roberts, N. J., Barendregt, R. W. & Clague, J. J.** 2018. Pliocene and Pleistocene  
1282 chronostratigraphy of continental sediments underlying the Altiplano at La Paz, Bolivia.  
1283 *Quaternary Science Reviews*, **189**, 105–126. doi:10.1016/j.quascirev.2018.03.008
- 1284 **Rodrigues, F. H., Medri, I. M., De Miranda, G. H., Alves, C. & Mourão, G.** 2008.  
1285 Anteater behavior and ecology. Pp. 257–268 in S. F. Vizcaíno & W. J. Loughry (eds) *The*  
1286 *biology of the Xenarthra*. University Press of Florida, Gainesville.
- 1287 **Rovereto, C.** 1914. Los estratos araucanos y sus fósiles. *Anales del Museo Nacional de*  
1288 *Historia Natural de Buenos Aires*, **25**, 1–247.
- 1289 **Salas-Gismondi, R., Flynn, J. J., Baby, P., Tejada-Lara, J. V., Wesselingh, F. P. &**  
1290 **Antoine, P. O.** 2015. A Miocene hyperdiverse crocodylian community reveals peculiar  
1291 trophic dynamics in proto-Amazonian mega-wetlands. *Proceedings of the Royal Society B:*  
1292 *Biological Sciences*, **282**(1804), 20142490. doi:10.1098/rspb.2014.2490
- 1293 **Salzmann, U., Williams, M., Haywood, A. M., Johnson, A. L., Kender, S. &**  
1294 **Zalasiewicz, J.** 2011. Climate and environment of a Pliocene warm world.  
1295 *Palaeogeography, Palaeoclimatology, Palaeoecology*, **309**(1–2), 1–8.  
1296 doi:10.1016/j.palaeo.2011.05.044
- 1297 **Sandoval-Gómez, V. E., Ramírez-Chaves, H. E. & Marín, D.** 2012. Registros de  
1298 hormigas y termitas presentes en la dieta de osos hormigueros (Mammalia:  
1299 Myrmecophagidae) en tres localidades de Colombia. *Edentata*, **13**(1), 1–10.  
1300 doi:10.5537/020.013.0104

- 1301 **Scillato-Yané, G. J. & Carlini, C. C.** 1998. Nuevos Xenarthra del Friasense (Mioceno  
1302 medio) de Argentina. *Studia Geológica Salmanticensia*, **34**: 43–67.
- 1303 **Sereno, P. C.** 1991. Basal archosaurs: Phylogenetic relationships and functional  
1304 implications. *Journal of Vertebrate Paleontology*, **11**(S4), 1–53.  
1305 doi:10.1080/02724634.1991.10011426
- 1306 **Seoane, F. D., Roig Juñent, S. & Cerdeño, E.** 2017. Phylogeny and paleobiogeography of  
1307 Hegetotheriidae (Mammalia, Notoungulata). *Journal of Vertebrate Paleontology*, **37**(1),  
1308 e1278547. doi:10.1080/02724634.2017.1278547
- 1309 **Spradley, J. P., Glazer, B. J. & Kay, R. F.** 2019. Mammalian faunas, ecological indices,  
1310 and machine-learning regression for the purpose of paleoenvironment reconstruction in the  
1311 Miocene of South America. *Palaeogeography, Palaeoclimatology, Palaeoecology*, **518**,  
1312 155–171. doi:10.1016/j.palaeo.2019.01.014
- 1313 **Shaw C. A. & McDonald H. G.** 1987. First record of giant anteater (Xenarthra:  
1314 Myrmecophagidae) in North America. *Science*, **236**, 186–188.  
1315 doi:10.1126/science.236.4798.186
- 1316 **Šímová, I. & Storch, D.** 2017. The enigma of terrestrial primary productivity:  
1317 Measurements, models, scales and the diversity-productivity relationship. *Ecography*,  
1318 **40**(2), 239–252. doi:10.1111/ecog.02482
- 1319 **Sniderman, J. K., Woodhead, J. D., Hellstrom, J., Jordan, G. J., Drysdale, R. N.,  
1320 Tyler, J. J. & Porch, N.** 2016. Pliocene reversal of late Neogene aridification. *Proceedings  
1321 of the National Academy of Sciences*, **113**(8), 1999–2004. doi:10.1073/pnas.1520188113

- 1322 **Tobin, J. E.** 1995. Ecology and diversity of tropical forest canopy ants. Pp. 129–147. In M.  
1323 D. Lowman & N. M. Nadkarni (eds.) *Forest Canopies*. Academic Press, New York.
- 1324 **Toby Pennington, R., Prado, D. E. & Pendry, C. A.** 2000. Neotropical seasonally dry  
1325 forests and Quaternary vegetation changes. *Journal of Biogeography*, **27**(2), 261–273.  
1326 doi:10.1046/j.1365–2699.2000.00397.x
- 1327 **Toledo, N., Bargo, M. S., Vizcaíno, S. F., De Iuliis, G. & Pujos, F.** 2017. Evolution of  
1328 body size in anteaters and sloths (Xenarthra, Pilosa): Phylogeny, metabolism, diet and  
1329 substrate preferences. *Earth and Environmental Science Transactions of the Royal Society*  
1330 *of Edinburgh*, **106**(4), 289–301. doi:10.1017/S1755691016000177
- 1331 **Thompson, J. N.** 1994. *The Coevolutionary Process*. University of Chicago Press, Chicago  
1332 IL., 360 pp.
- 1333 **Wiens, J. J. & Donoghue, M. J.** 2004. Historical biogeography, ecology and species  
1334 richness. *Trends in Ecology & Evolution*, **19**(12), 639–644. doi:10.1016/j.tree.2004.09.011
- 1335 **Wiens, J. J. & Graham, C. H.** 2005. Niche conservatism: Integrating evolution, ecology,  
1336 and conservation biology. *Annual Reviews in Ecology, Evolution and Systematics*, **36**, 519–  
1337 539. doi: 10.1146/annurev.ecolsys.36.102803.095431
- 1338 **Williams, J. W., Shuman, B. N., Webb III, T., Bartlein, P. J. & Leduc, P. L.** 2004.  
1339 Late Quaternary vegetation dynamics in North America: Scaling from taxa to biomes.  
1340 *Ecological Monographs*, **74**(2), 309–334. doi:10.1890/02–4045
- 1341 **Williams, J.** 2009. Quaternary vegetation distributions. Pp. 856–862 in V. Gornitz (ed.)  
1342 *Encyclopedia of Paleoclimatology and Ancient Environments*. Springer, Dordrecht.

- 1343 **Wood, B. & Lonergan, N.** 2008. The hominin fossil record: Taxa, grades and clades.  
1344 *Journal of Anatomy*, **212**(4), 354–376. doi:10.1111/j.1469–7580.2008.00871.x
- 1345 **Woodburne, M. O.** 2010. The Great American Biotic Interchange: Dispersals, tectonics,  
1346 climate, sea level and holding pens. *Journal of Mammalian Evolution*, **17**(4), 245–264.  
1347 doi:10.1007/s10914-010-9144-8
- 1348 **Zavala, C. & Navarro, E.** 1993. Depósitos fluviales en la Formación Monte Hermoso  
1349 (Plioceno inferior-medio), Provincia de Buenos Aires. *Actas*, **5**(2), 236–244.
- 1350 **Zachos, J., Pagani, M., Sloan, L., Thomas, E. & Billups, K.** 2001. Trends, rhythms, and  
1351 aberrations in global climate 65 Ma to present. *Science*, **292**(5517), 686–693.  
1352 doi:10.1126/science.1059412
- 1353 **Zachos, J. C., Dickens, G. R. & Zeebe, R. E.** 2008. An early Cenozoic perspective on  
1354 greenhouse warming and carbon-cycle dynamics. *Nature*, **451**(7176), 279.
- 1355 **Zimicz, N., Payrola, P. & del Papa, C.** 2018. New, Late Miocene mammalian assemblage  
1356 from the Palo Pintado Formation (Northwestern Argentina). *Journal of South American*  
1357 *Earth Sciences*, **81**, 31–44. doi:10.1016/j.jsames.2017.11.003

1358

## 1359 **Figure captions**

1360 **Figure 1.** Geographical and stratigraphic provenance of the skull VPPLT 975 of the new  
1361 taxon described here and the holotype of *Neotamandua borealis* (Hirschfeld 1976). **A**,  
1362 location of the Department of Huila in Colombia; **B**, location of the fossil area of interest,  
1363 i.e. northern of La Venta area, in the Department of Huila (small rectangle); **C**, location of

1364 the fossil site (black star), near the La Victoria town; **D**, stratigraphic scheme of Guerrero  
1365 (1997) for La Venta area, with approximate stratigraphic provenance of VPPLT 975 and  
1366 the holotype of *N. borealis*.

1367 **Figure 2.** Cranial measurements used in this work. All are based on Hossotani et al. (2017).  
1368 Nomenclatural modifications from these measurements are shown in the section of  
1369 Anatomical Abbreviations. **A**, skull of *Tamandua* in dorsal view; **B**, the same skull in  
1370 ventral view. **Abbreviations:** **FL**, frontal length; **GSL**, greatest skull length; **MBW**,  
1371 maximum braincase width; **ML**, maxilla length; **NL**, nasal length; **NW**, nasal width; **PL**,  
1372 parietal length.

1373 **Figure 3.** Holotypic skull (VPPLT 975) of Gen. et sp. nov. **A**, dorsal view; **B**, right lateral  
1374 view; **C**, ventral view; **D**, left lateral view; **E**, anatomical drawing in dorsal view; **F**,  
1375 anatomical drawing in right lateral view. **Abbreviations:** **fr**, frontals; **ji**, jugal insertion; **la**,  
1376 lacrimal; **mx**, maxilla; **na**, nasals; **or**, orbit. Scale bar equal to 30 mm.

1377 **Figure 4.** Two very informative postcranial bones of the holotype (UCMP 39847) of  
1378 *Neotamandua borealis* (Hirschfeld 1976). **A**, right astragalus, dorsal view; **B**, right  
1379 astragalus, ventral view; **C**, left calcaneum, dorsal view; **D**, left calcaneum, lateral view; **E**,  
1380 anatomical drawing of the astragalus in dorsal view; **F**, anatomical drawing of the  
1381 astragalus in ventral view; **G**, anatomical drawing of the calcaneum in dorsal view; **H**,  
1382 anatomical drawing of the calcaneum in lateral view. **Abbreviations:** **af**, calcaneal  
1383 accessory facet; **ct**, calcaneal tuber; **ef**, ectal facet; **ff**, fibular facet; **h**, astragalar head; **lr**,  
1384 lateral ridge; **lt**, lateral trochlea; **mt**, medial trochlea; **sf**, sustentacular facet. Scale bar equal  
1385 to 20 mm.

1386 **Figure 5.** Epitype (FMNH P14419) of *Neotamandua conspicua*. **A**, dorsal view; **B**, right  
1387 lateral view; **C**, ventral view; **D**, left lateral view; **E**, right hemimandible; **F**, left  
1388 hemimandible; **G**, anatomical drawing in dorsal view; **H**, anatomical drawing in ventral  
1389 view; **I**, anatomical drawing in left lateral view. **Abbreviations:** **ab**, auditory bullae; **fr**,  
1390 frontals; **j**, jugal; **mx**, maxilla; **na**, nasals; **oc**, occipital condyles; **pal**, palatines; **ptb**,  
1391 pterygoid bullae; **pte**, pterygoids; **szp**, squamosal zygomatic process. Scale bar equal to 80  
1392 mm.

1393 **Figure 6.** Reconstruction the external appearance in life of Gen. et sp. nov. (close-up view).  
1394 In the background, individuals of the macraucheniid *Theosodon* (left) and the alouattine  
1395 *Stirtonia* (upper right corner) in the tropical forest of La Venta, late Middle Miocene of  
1396 Colombia.

1397 **Figure 7.** Geographic and chronological distribution of the myrmecophagid fossil records  
1398 during the Late Cenozoic. Note the only two fossil records of these xenartrons outside  
1399 South America in the Pleistocene of southern and northern Mexico (*Tamandua* sp. and  
1400 *Myrmecophaga tridactyla*, respectively). Based on information compiled by McDonald et  
1401 al. (2008). Original references in the same work and, largely, in the main text here.

1402 **Figure 8.** Chronological collation of data on: **A**, biochrons of the myrmecophagid genera or  
1403 questionable grouping (horizontal solid bars and dashed line); **B**, distribution of the highest  
1404 latitudinal fossil records (northern and/or southern) of myrmecophagids (horizontal solid  
1405 bars) and approximate, chronologically discrete latitudinal ranges of tropical rainforest plus  
1406 tropical and subtropical dry broadleaf forest (i.e. frost-free areas [mean annual temperatures  
1407 higher than 15°C] with significant rainfall, at least seasonally; large vertical rectangles); **C**,  
1408 general trend curve of global temperature and climatic episodes during the Late Cenozoic:



1409 **a**, early Neogene warm recovery, including the thermal peak in the late Early-early Middle  
1410 Miocene known as Middle Miocene Climatic Optimum or MMCO; **b**, Middle Miocene  
1411 climatic transition; **c**, late Middle-Late Miocene cooling; **d**, Early Pliocene warming; **e**,  
1412 Late Pliocene-Pleistocene cooling and glaciations. The vertical dashed line indicates the  
1413 time of complete formation of the Panama Land Bridge, which represented thereafter a  
1414 fundamentally continuous physical connection between South- and North America.  
1415 Palaeocological data used for the plot in ‘B’ is from the following references: Huntley &  
1416 Webb III (1988); Toby Pennington et al. (2000); Williams et al. (2004); Williams (2009);  
1417 Chan et al. (2011); Morley (2011); Kay et al. (2012); Pound (2012); Pound et al. (2012);  
1418 Forrest et al. (2015); Lohmann et al. (2015); Dowsett et al. (2016); Sniderman et al. (2016);  
1419 Henrot et al. (2017); Frigola et al. (2018). The temperature curve in ‘C’ is based on Zachos  
1420 et al. (2001, 2008) and it is reproduced with permission.

1421

1422

1423

1424

1425

1426

1427

1428

1429

## TABLES

Table 1. Cranial measurements (in mm) for the holotype of Gen. et sp. nov. and other myrmecophagid species

| Measurement | Gen. et sp. nov. <sup>a</sup> | <i>P. rothi</i> <sup>b</sup> | <i>N. conspicua</i> <sup>c</sup> | <i>T. tetradactyla</i> <sup>d</sup> | <i>M. tridactyla</i> <sup>e</sup> |
|-------------|-------------------------------|------------------------------|----------------------------------|-------------------------------------|-----------------------------------|
| GSL         | 80.7*                         | 77*                          | 210**                            | 125.7                               | 327.5                             |
| NL          | 30.9                          | □                            | ~110                             | 38.2                                | 127.5                             |
| NW          | 4.8                           | □                            | 11.1                             | 7.7                                 | 14.2                              |
| FL          | □                             | ~27                          | □                                | 53.1                                | 143.9                             |
| MBW         | □                             | 36                           | ~51                              | 42.2                                | 60.4                              |
| PL          | □                             | ~20                          | □                                | 20.1                                | 26                                |

a. VPPLT 975 (holotype)

b. YPM-15267

c. FMNH P14419

d. Mean of a sample of (sub) adults, n = 8 (Appendix 2, Supplementary material)

e. Mean of a sample of (sub) adults, n = 10 (Appendix 2, Supplementary material)

\*Incomplete skull. Rough estimate of GSL for Gen. et sp. nov. from a simple linear model based on some skull measurements for *Tamandua* (see Supplementary Material) is equal to 118.6 mm.

\*\*Fractured rostrum

Table 2. Comparison of some postcranial measurements (in mm) between *N. borealis* and *N. greslebini*.

| Measurement                             | <i>N. borealis</i> | <i>N. greslebini</i> |
|-----------------------------------------|--------------------|----------------------|
| Maximum distal width of the radius      | 16.5               | 29                   |
| Maximum proximal width of the tibia     | 29.5               | 46                   |
| Proximo-distal length of the astragalus | 41.5               | 55                   |
| Maximum width of the astragalus         | 16.4               | 20.5                 |

Table 3. Comparison of some postcranial measurements (in mm) between *N. borealis* and *Neotamandua* sp.

| Measurement                                                | <i>N. borealis</i> | <i>Neotamandua</i> sp. |
|------------------------------------------------------------|--------------------|------------------------|
| Maximum distal width of the radius                         | 16.5               | 35                     |
| Maximum width of the tibial articulation of the astragalus | 20                 | 24                     |
| Maximum width of the calcaneum                             | 20                 | ~21                    |

**Table 4.** Distribution of some postcranial characters of species referred to *Neotamandua* and other myrmecophagid taxa. The

|                                                                         | <i>N. borealis</i>                                  | <i>N. greslebini</i>                                | <i>Neotamandua</i> sp. | <i>Protamandua</i> | <i>Tamandua</i>            | <i>Myrmecophaga</i> |
|-------------------------------------------------------------------------|-----------------------------------------------------|-----------------------------------------------------|------------------------|--------------------|----------------------------|---------------------|
| Relative body size                                                      | Medium to large                                     | Large                                               | Very large             | Small              | Medium                     | Very large          |
| Character                                                               |                                                     |                                                     |                        |                    |                            |                     |
| 1. Arrangement of the radial ridges                                     | Parallel ridges                                     | Parallel ridges                                     | Parallel ridges        | NA                 | Distally convergent ridges | Parallel ridges     |
| 2. Rotated appearance of the distal radius                              | Absent                                              | Absent                                              | Absent                 | Absent             | Present                    | Absent              |
| 3. Tibial mid-section*                                                  | Sub-rounded to gently triangular                    | Sub-rounded to gently triangular                    | NA                     | NA                 | Rounded                    | Strongly triangular |
| 4. Arrangement of the ectal and sustentacular facets in the astragalus* | Largely separated, but with an incipient connection | Largely separated, but with an incipient connection | NA                     | Fully separated    | Fully separated            | Widely connected    |
| 5. Tendinous groove in the lateral side of the calcaneum*               | Short                                               | Short                                               | NA                     | Absent             | Absent                     | Long                |

characters marked with asterisk contain potentially diagnostic character states (synapomorphies?) for *Neotamandua*.

**Table 5.** Taxonomic breadth in diet (genus level) of extant genera of Vermilingua and habitat preference of their MDCs (genera or species groups considered main dietary components). Key for the references: (1) Best & Harada (1985); (2) Fuster et al. 2018; (3) Gallo et al. (2017); (4) Gaudin et al. (2018); (5) Gómez et al. (2012); (6) Hayssen (2011); (7) Hayssen et al. (2012); (8) Jiménez et al. (2018); (9) Lubin & Montgomery (1981); (10) Medri et al. (2003); (11) Miranda et al. (2009); (12) Montgomery (1981); (13) Montgomery (1985a); (14) Montgomery (1985b); (15) Morales-Sandoval (2010); (16) Navarrete & Ortega (2011); (17) Redford (1985); (18) Rodrigues et al. (2008); (19) Sandoval-Gómez et al. (2012).

| Extant anteater genera | Termite genera | Ant genera | Some MDCs                                                                                                                               | Habitat preference of MDCs                                   | References                        |
|------------------------|----------------|------------|-----------------------------------------------------------------------------------------------------------------------------------------|--------------------------------------------------------------|-----------------------------------|
| <i>Cyclopes</i>        | 0              | 8          | <i>Camponotus</i><br><i>Dolichoderus</i><br><i>Solenopsis</i>                                                                           | Rainforest, seasonally dry tropical forest; trees            | 1, 7, 11, 13, 19                  |
| <i>Tamandua</i>        | 7              | 17         | <i>Nasutitermes</i><br><i>Camponotus</i><br><i>Crematogaster</i><br><i>Solenopsis</i>                                                   | Seasonally dry tropical forest, rainforest; trees and ground | 3, 6, 9, 12, 14, 15, 16           |
| <i>Myrmecophaga</i>    | 8              | 31         | <i>Cornitermes</i><br><i>Syntermes</i><br><i>Atta</i><br><i>Solenopsis</i><br><i>Camponotus</i><br><i>Acromyrmex</i><br><i>Pheidole</i> | savannah, grassland; ground                                  | 2, 3, 4, 5, 8, 10, 14, 17, 18, 19 |

# Figure 1

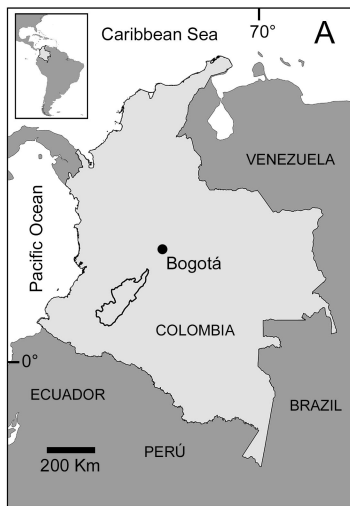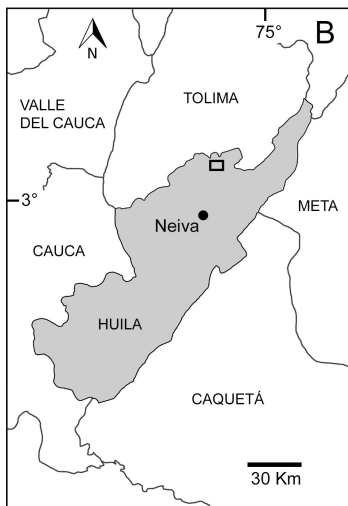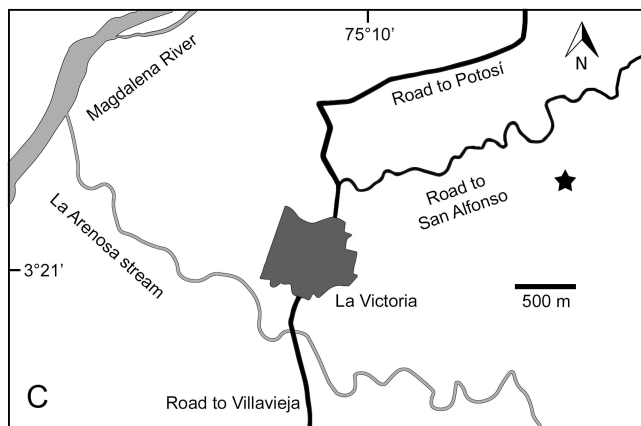

D

| Lithology | Unit             |
|-----------|------------------|
|           | Cerbatana cglm.  |
|           | Unit between     |
|           | Tatacoa ssb.     |
|           | Unit between     |
|           | Chunchullo ssb.  |
|           | Unit between     |
|           | Cerro Gordo ssb. |
|           | Unit below       |

← *Neotamandua borealis*

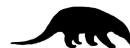

← VPPLT 975

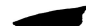

ssb. sandstone beds  
cglm. conglomerate

Fine grained sedimentites (mudstones, claystones)

Massive and geographically extended sandstones

Clast-supported conglomerate

★ Fossil locality (specimen VPPLT 975)



Figure 2

A

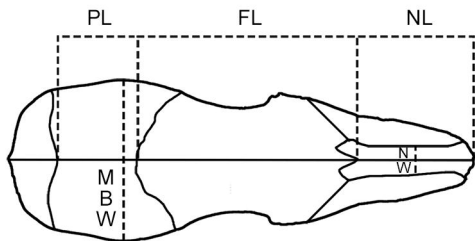

B

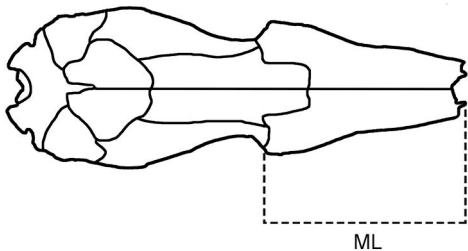

Figure 3

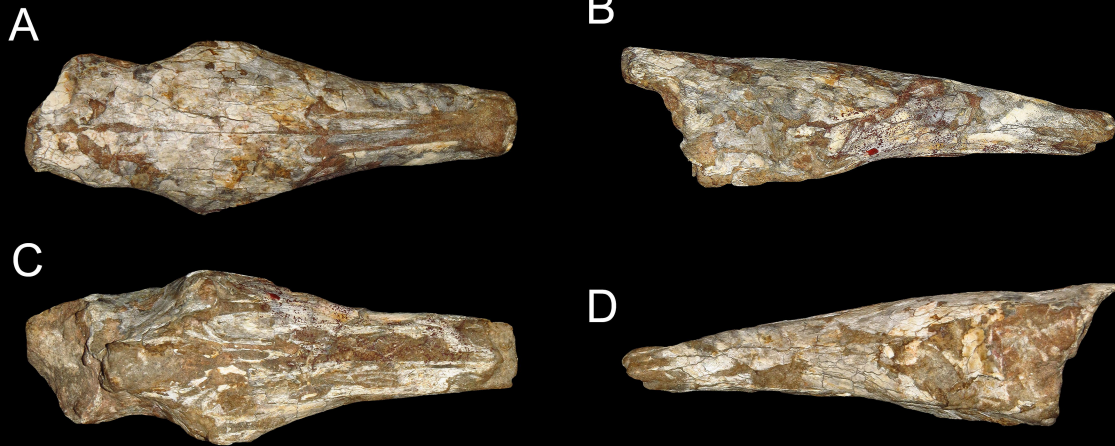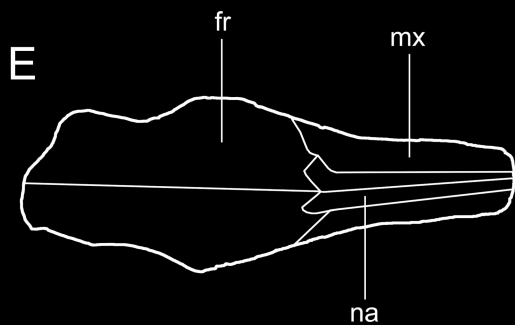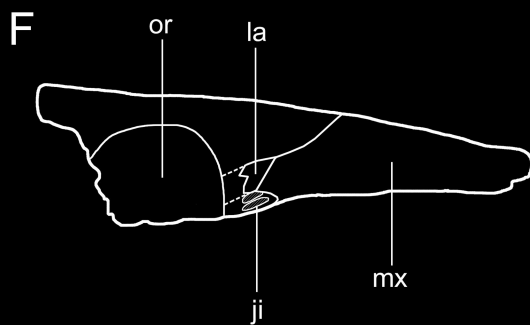

Figure 4

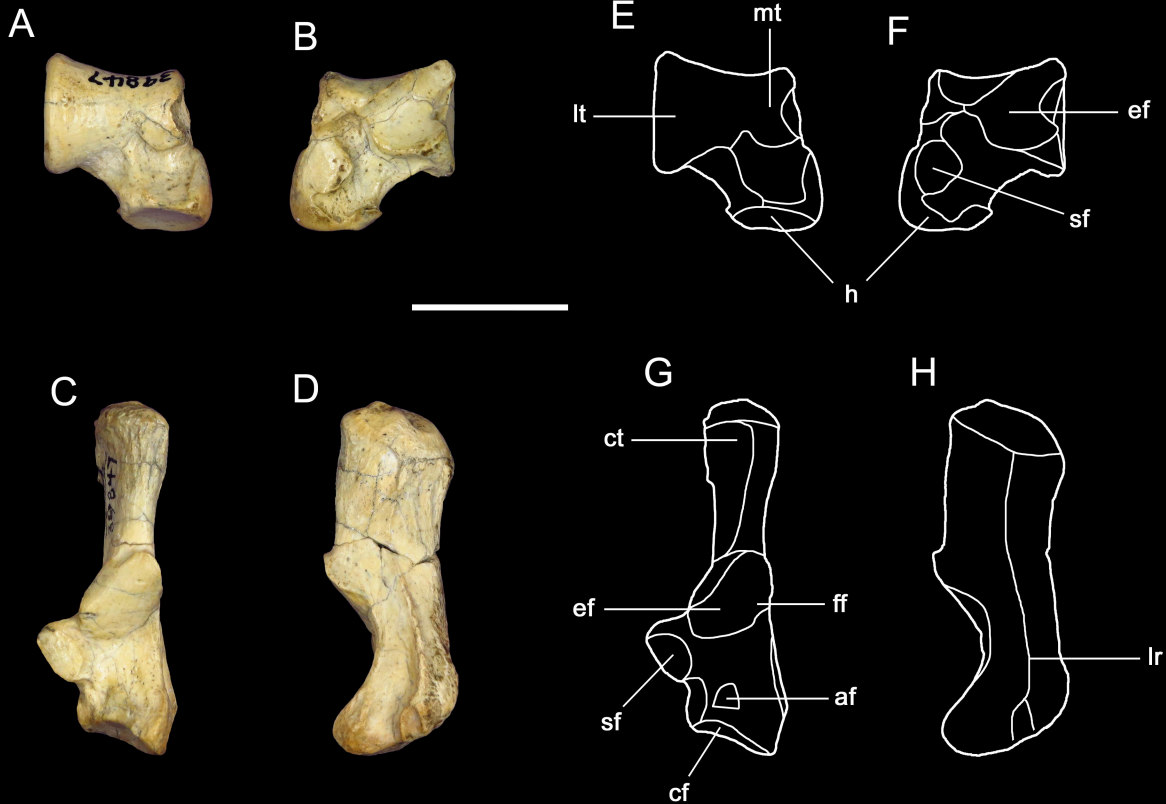

Figure 5

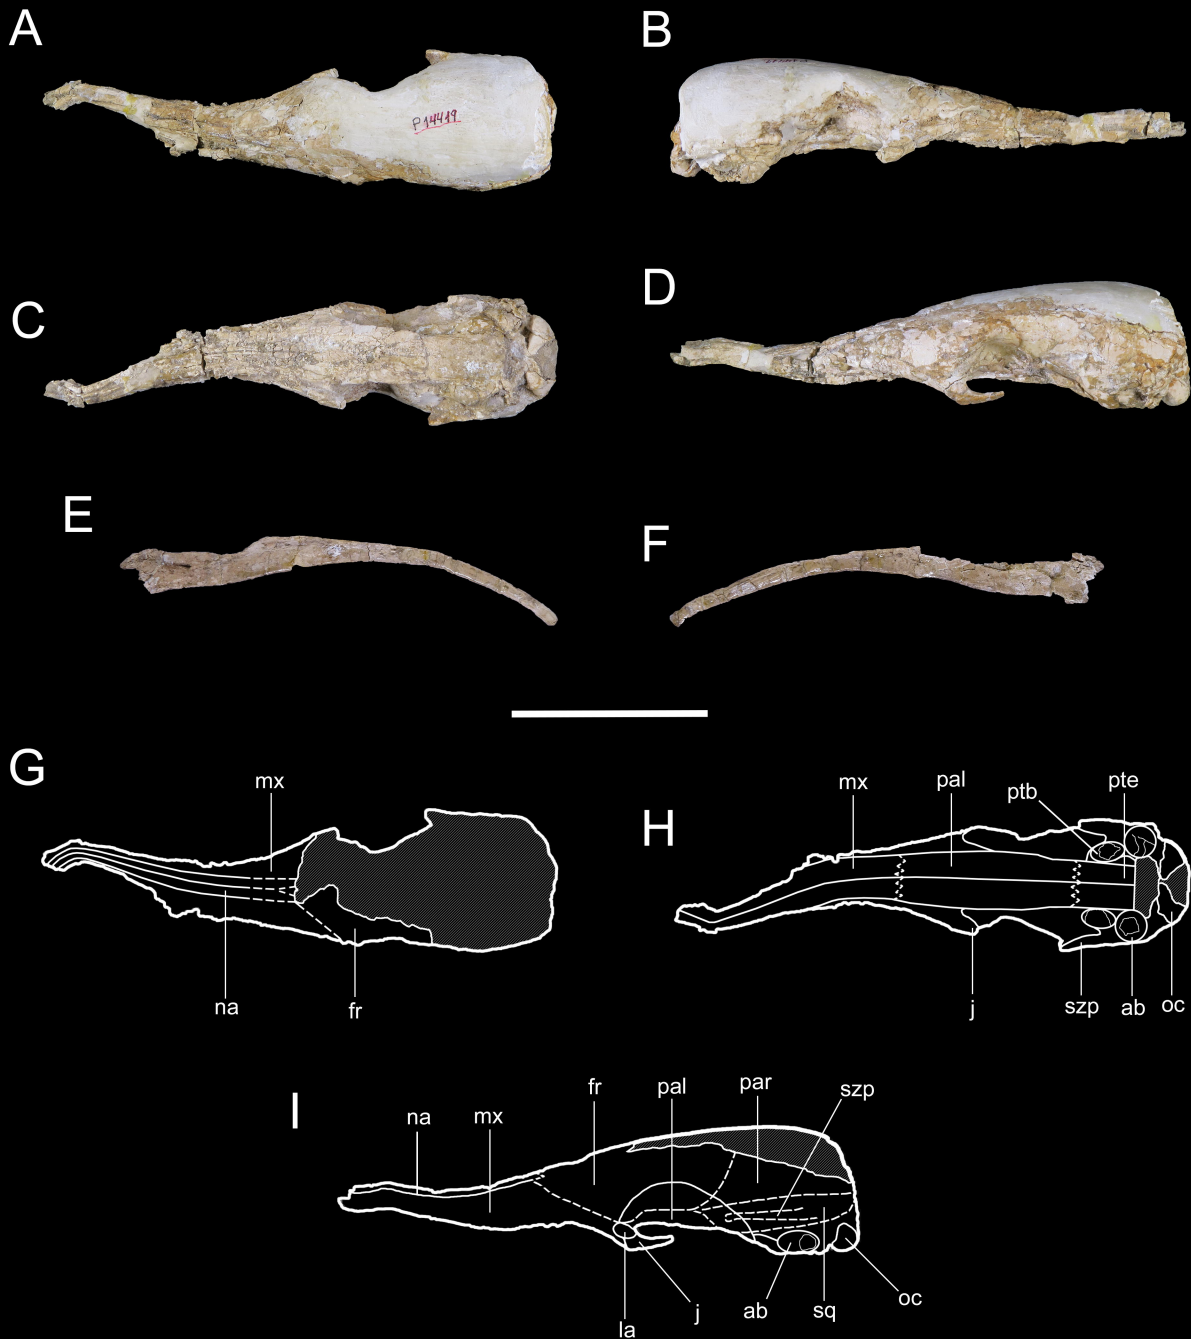

Figure 6

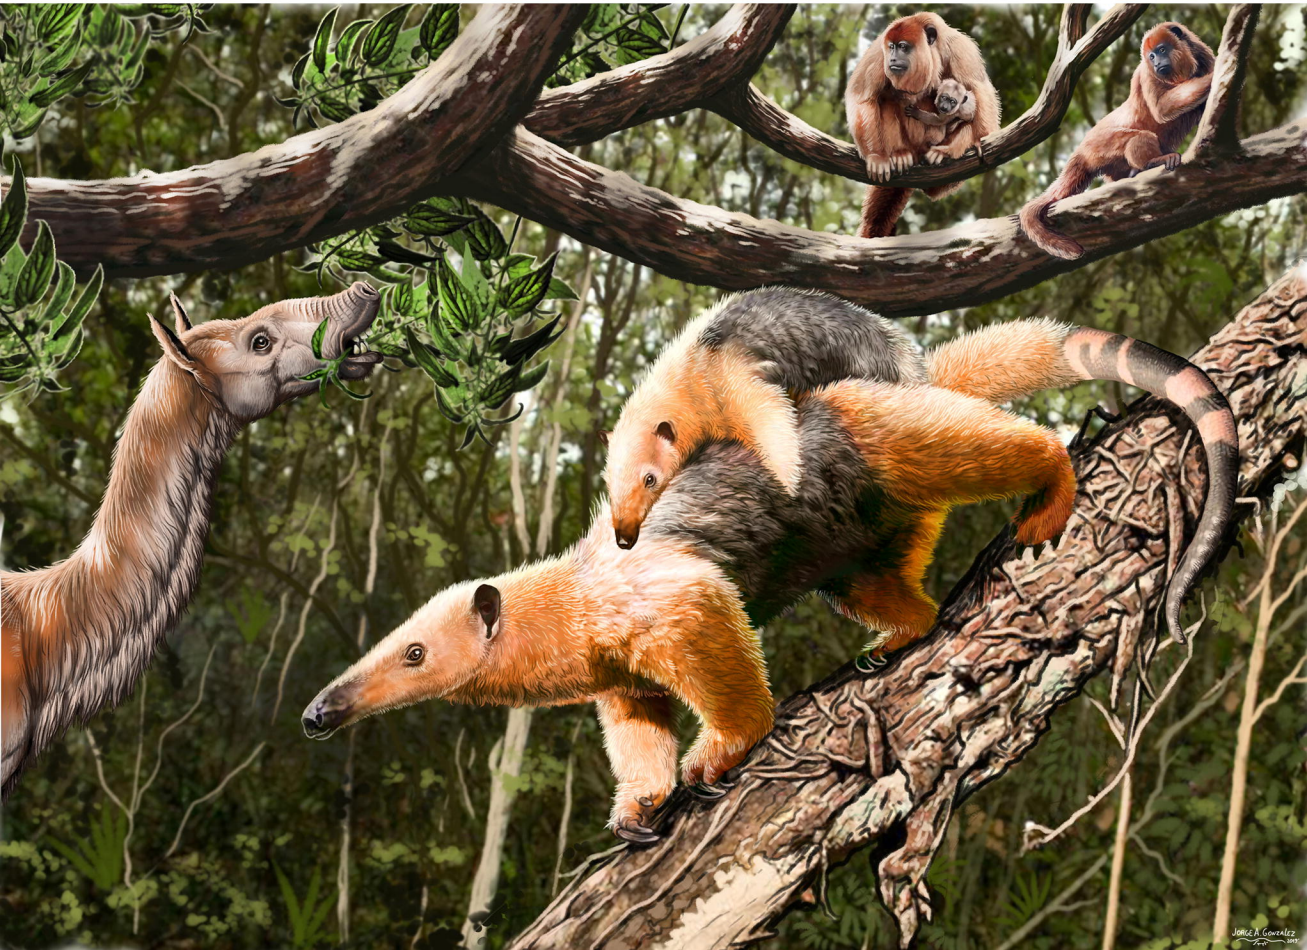

Figure 7

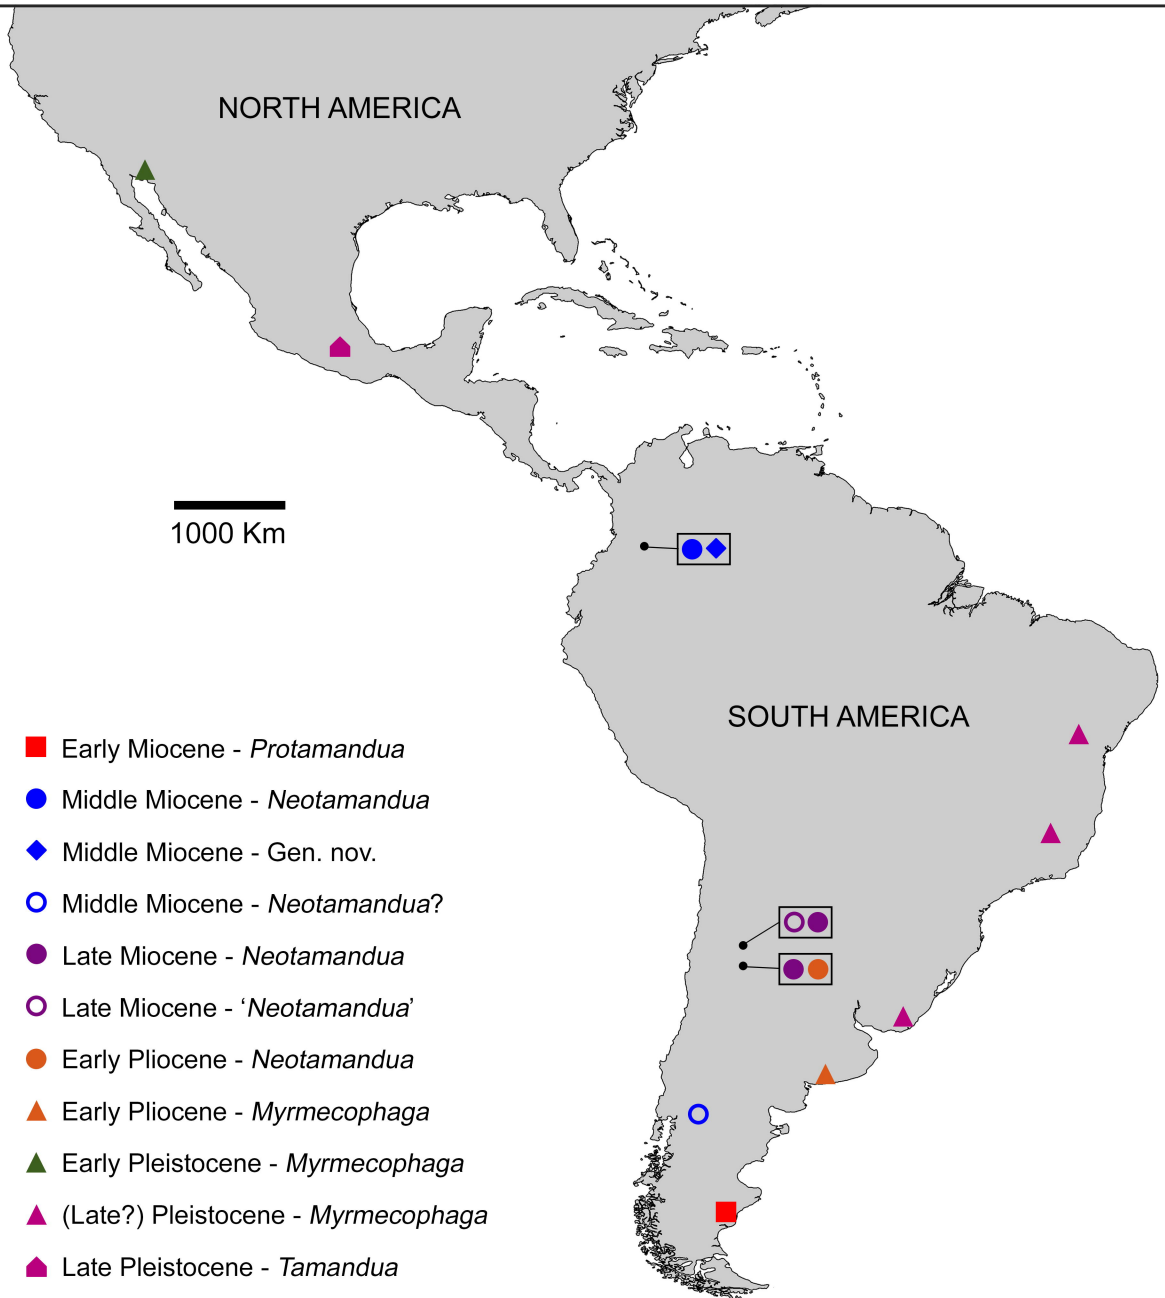

Figure 8

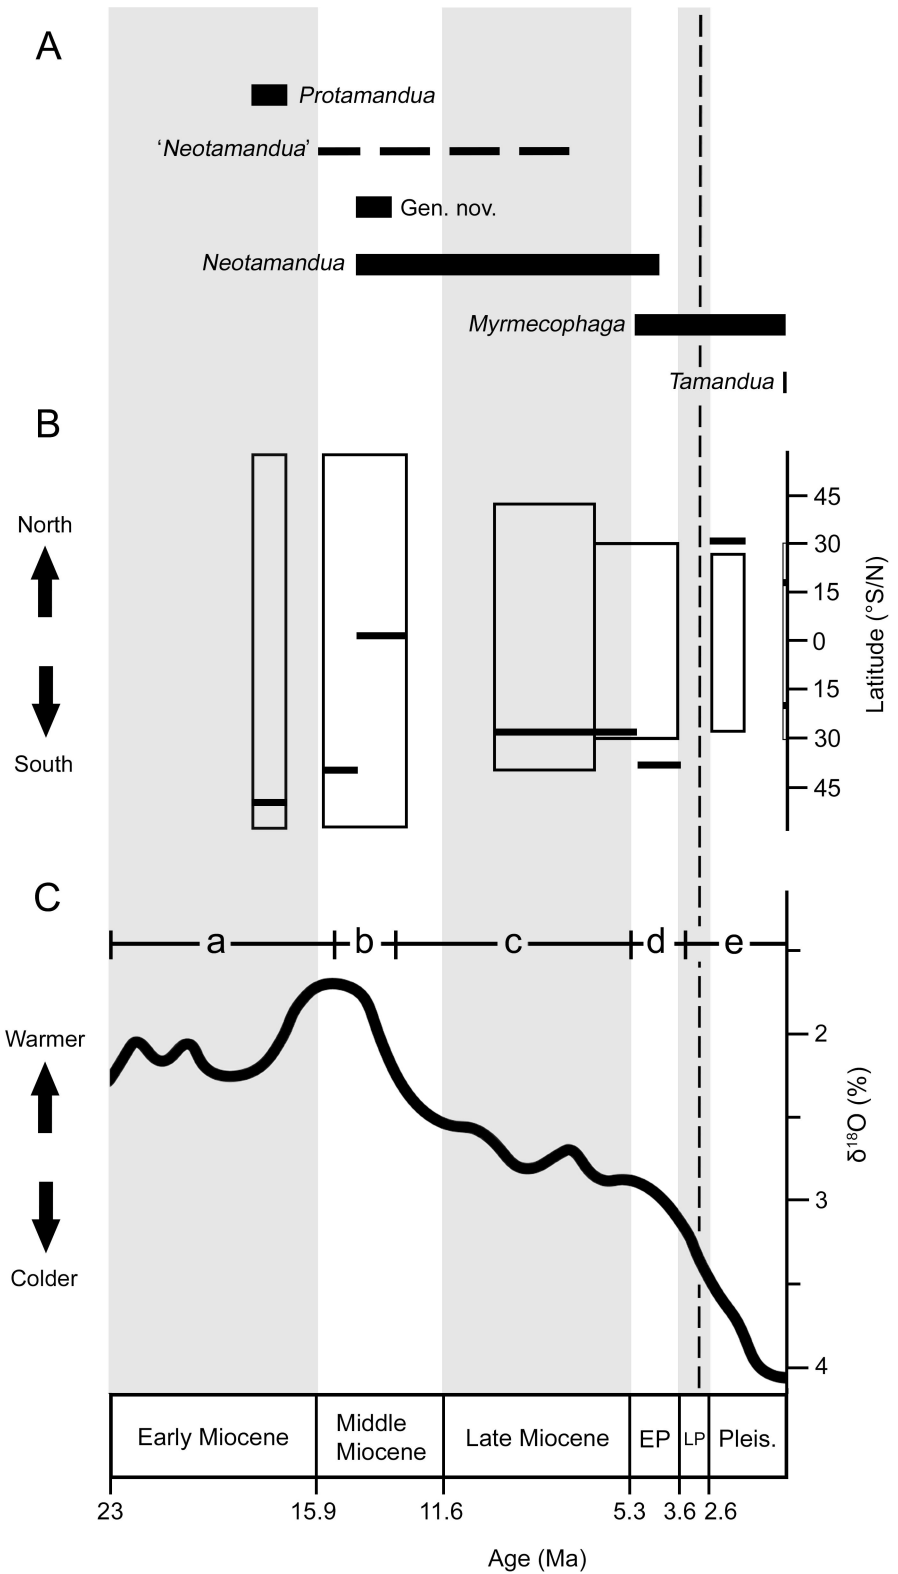

Source: https://www.biorxiv.org/content/10.1101/793307v3.full.pdf
